# Supplementary material for: A Plasmodium yoelii HECT-like E3 ubiquitin ligase regulates parasite growth and virulence
Source: PubMed Central journal article supplement (PMC5548792; doi:10.1038/s41467-017-00267-3), 2017-08-09
Supplement: 41467_2017_267_MOESM3_ESM.pdf [file 41467_2017_267_MOESM3_ESM.pdf]

## Supplementary Figures

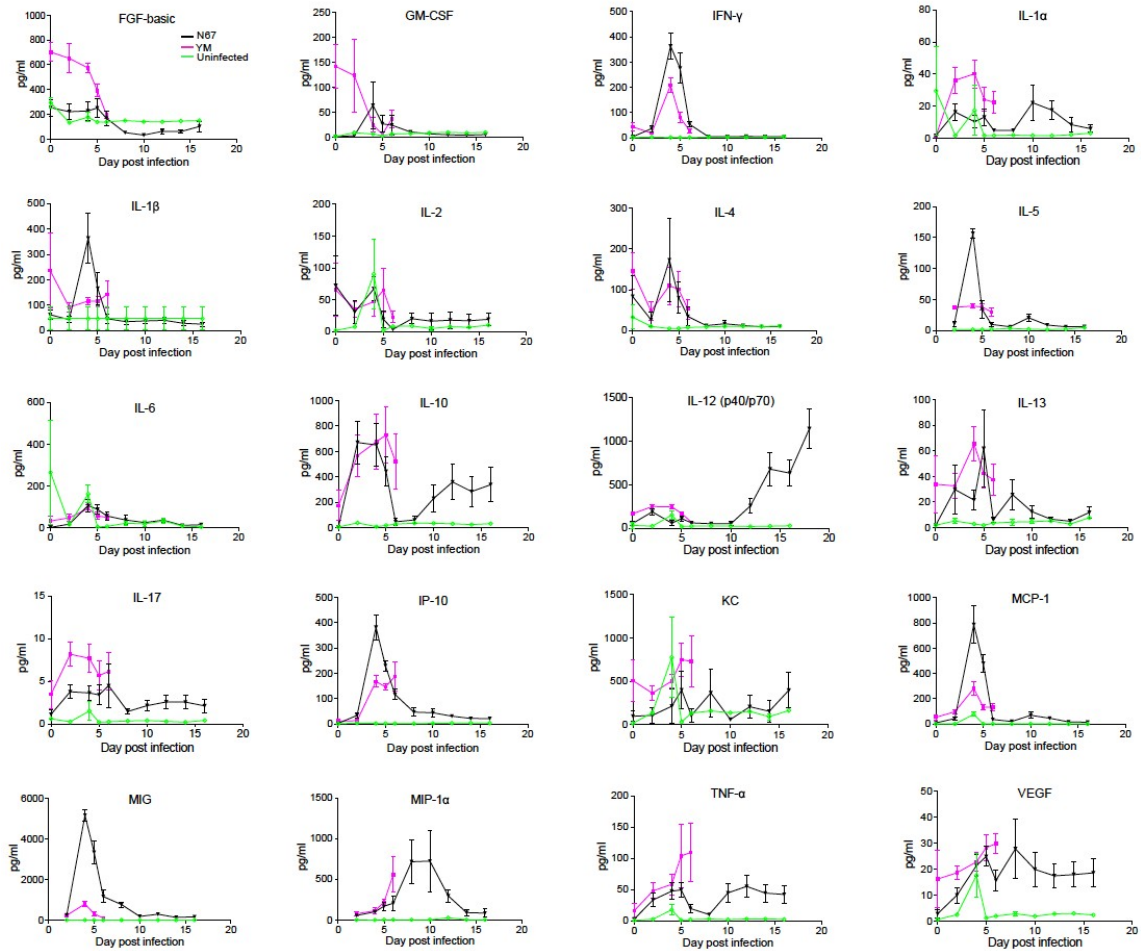

**Supplementary Fig. 1.** Cytokine and chemokine levels of mice infected with *Plasmodium yoelii nigeriensis* N67 and *P. y. yoelii* YM over time. Blood samples were collected at various days post infection, and cytokines and chemokines in the plasma were measured using a 20-plex Bead Array kit (Invitrogen). Blood samples from uninfected mice were also tested. Means and standard deviations were from 3-5 mice.

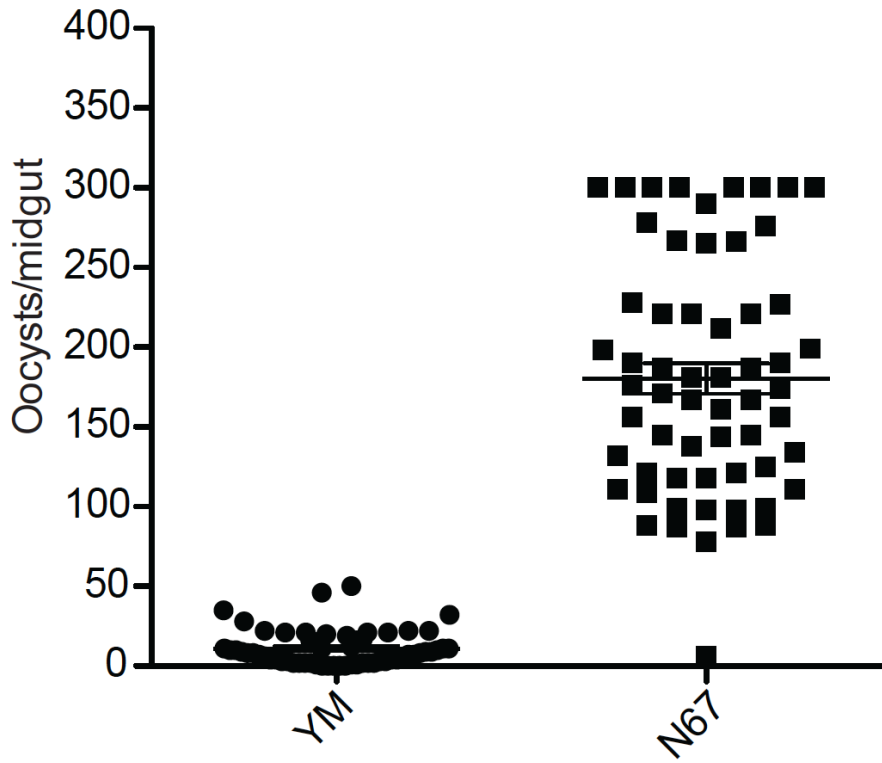

**Supplementary Fig. 2.** Oocyst counts from midguts of mosquitoes infected with *Plasmodium yoelii yoelii* YM or *P. y. nigeriensis* N67. Each dot or square represents oocyst counts from one mosquito midgut.

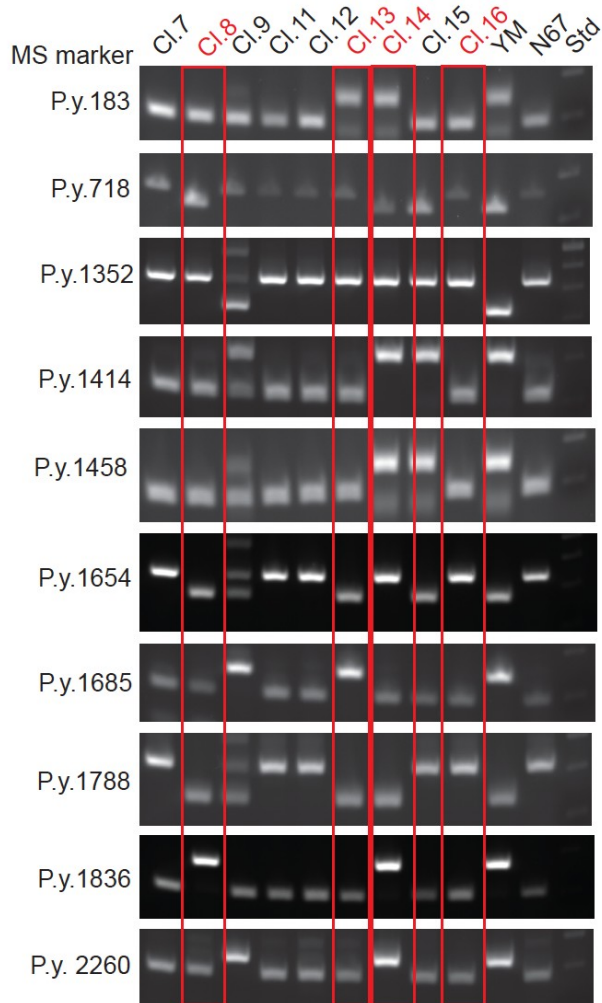

**Supplementary Fig. 3.** Agarose gels showing PCR products from ten microsatellites used for initial screening of parasite progeny of the *Plasmodium yoelii yoelii* YM and *P. y. nigeriensis* N67 crosses. Red color indicates potential independent progeny with unique marker combinations.

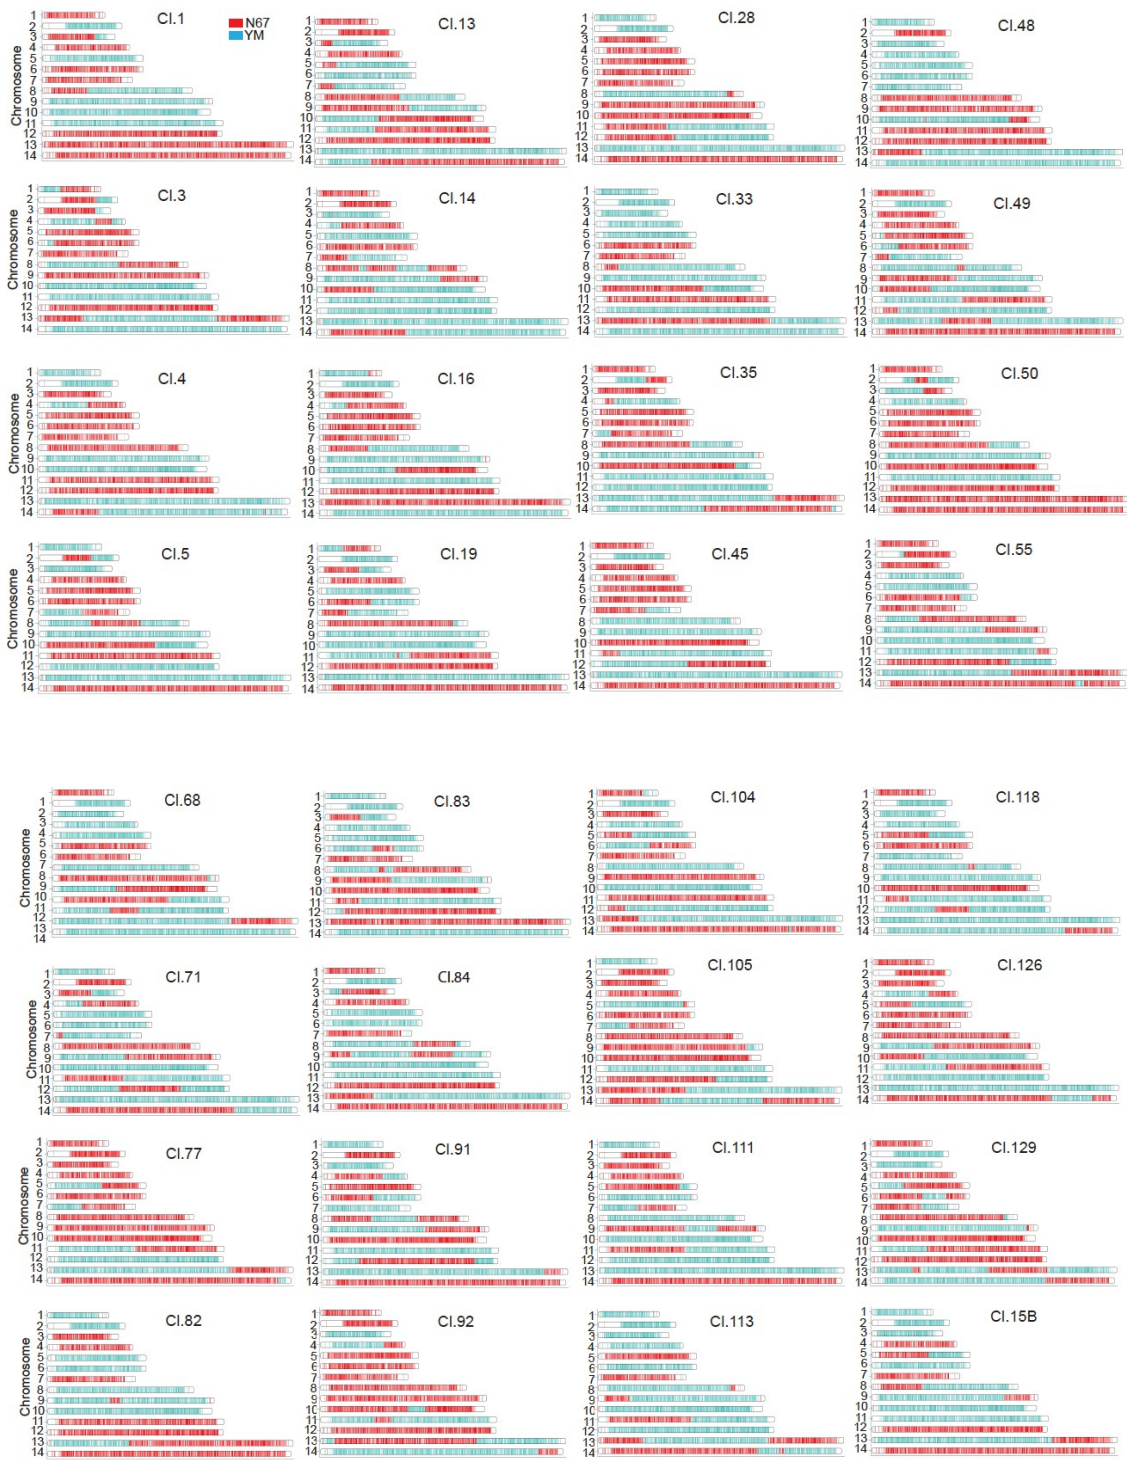

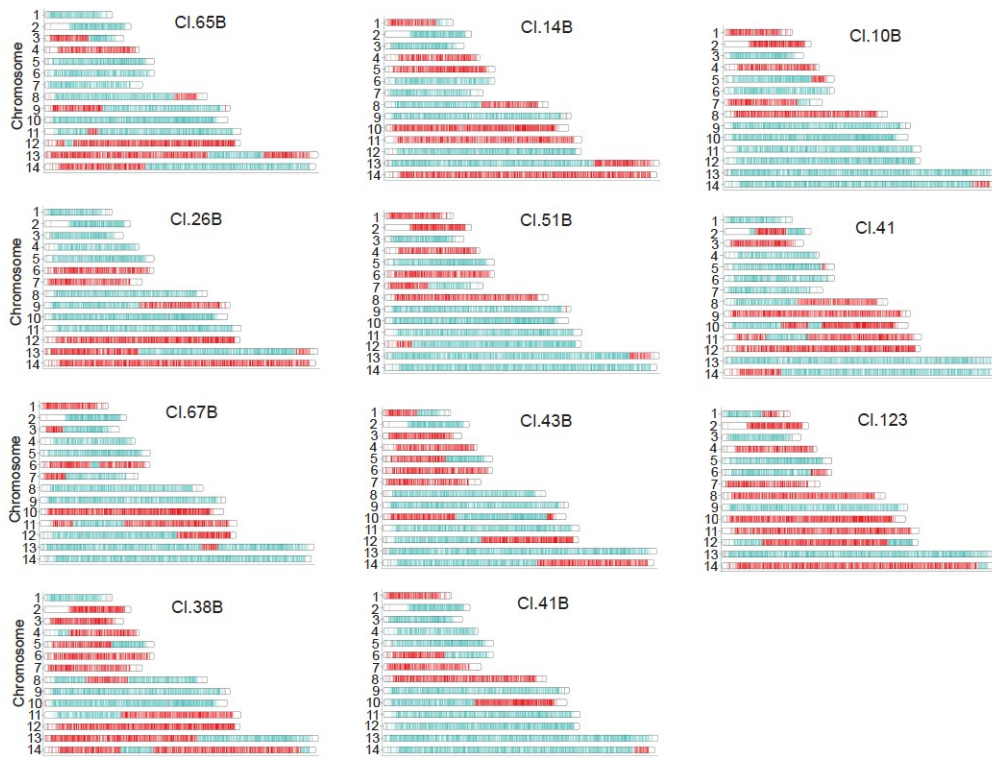

**Supplementary Fig. 4.** Graphic displays of genotypes of the parasite's 14 chromosomes from progeny of the YM  $\times$  N67 cross. The progeny names are as indicated. Cyan, YM genotype of approximately 9,200 single nucleotide polymorphisms (SNPs); red, N67 genotype of SNPs. In each figure, chromosomes are arranged from chromosome 1 (top) to 14 (bottom).



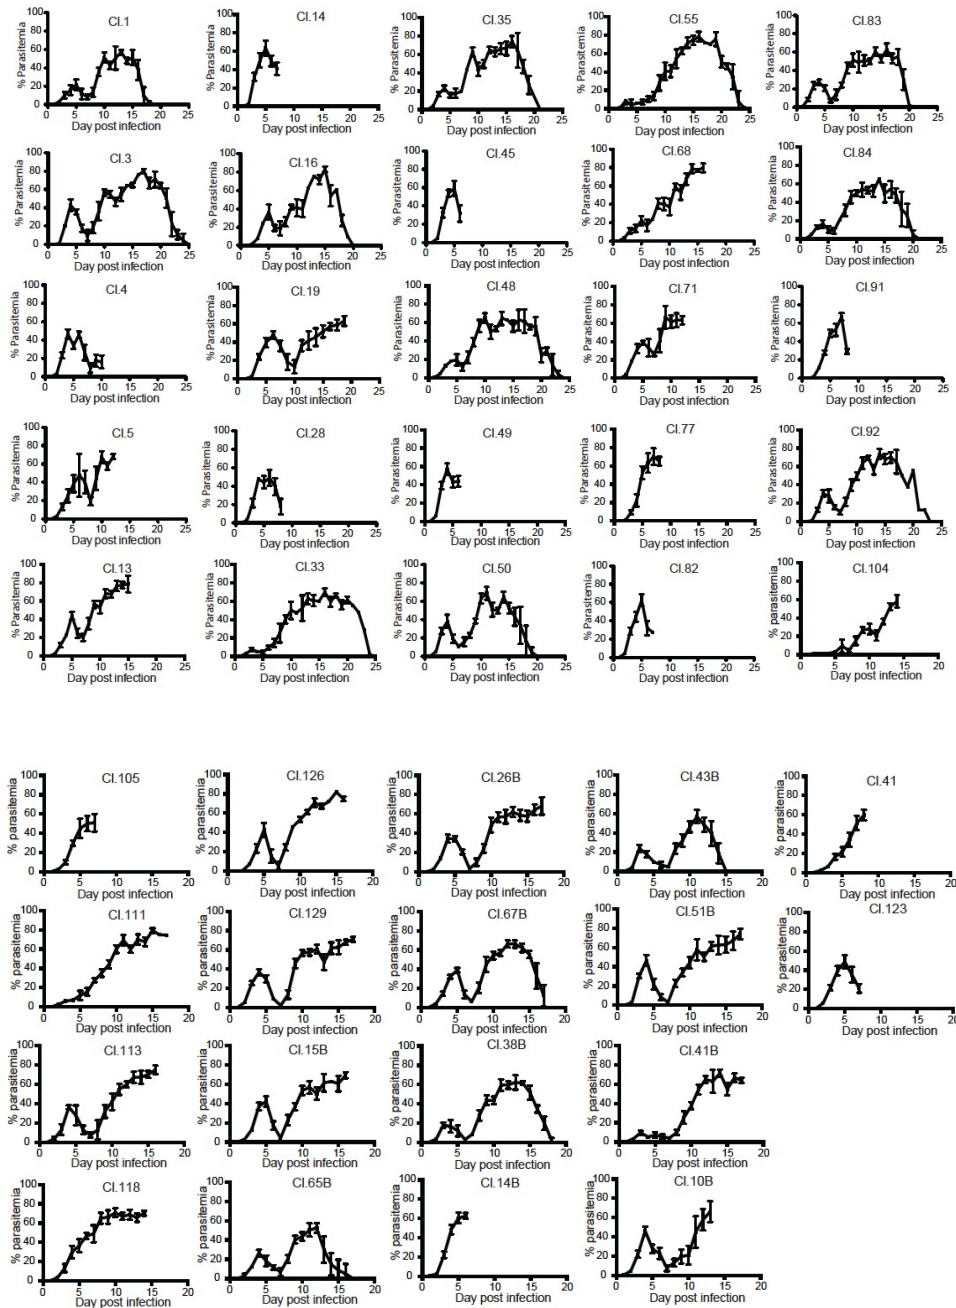

**Supplementary Fig. 5.** Parasitemia dynamics of the 43 progeny from the YM  $\times$  N67 cross. Mice were infected with  $1 \times 10^6$  parasites, and blood smears were made every other day from day 2 post infection until host death or clearance of parasites. The progeny names are as indicated. Mean parasitemia and standard deviations were calculated from 3-5 mice.

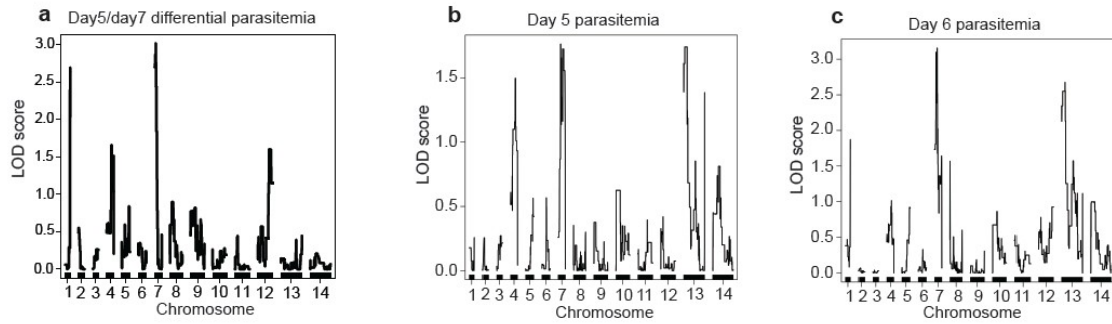

**Supplementary Fig. 6.** Plots of LOD scores (logarithm of the odds) for parasitemia from day 5-day 7 post infection with  $1 \times 10^6$  parasites. Quantitative trait loci (QTL) analysis was performed as described <sup>1,2</sup>. **(a)** Difference between day 5 and day 7 parasitemia as phenotype. **(b)** Day 5 parasitemia as phenotype. **(c)** Day 6 parasitemia as phenotype.

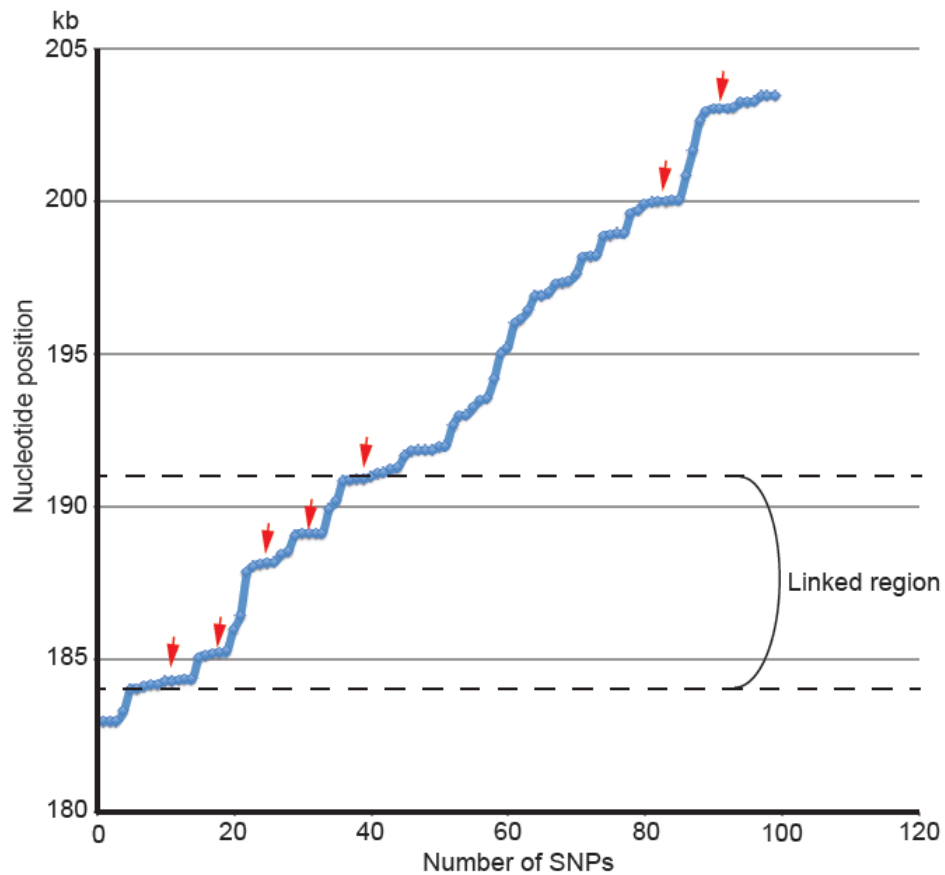

**Supplementary Fig. 7.** Nonsynonymous SNPs in the *Plasmodium yoelii* HECT E3 ubiquitin ligase gene. Nonsynonymous single nucleotide polymorphisms (SNPs) between *Plasmodium yoelii yoelii* YM and *P. y. nigeriensis* N67 were identified and plotted against their positions in the gene. The region between the dash-lines is the segment linked to the highest LOD (logarithm of odds) score. The red arrows point to highly polymorphic regions with clusters of SNPs. Note, there is no nonsynonymous SNPs at the 3' end of the gene spanning >1.5 kb (see Supplementary table 4).



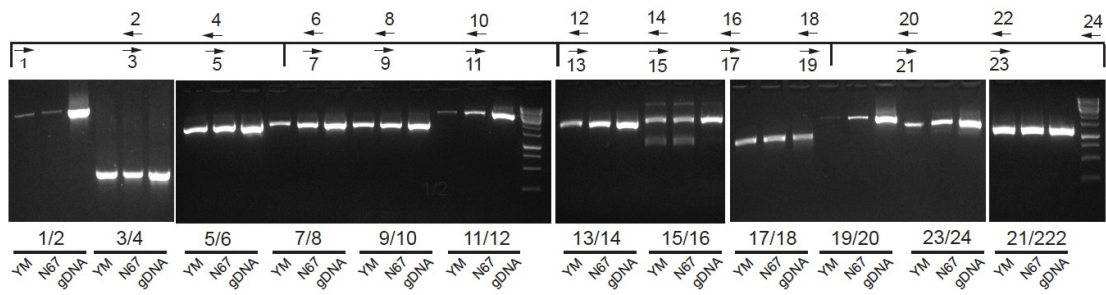

**Supplementary Fig. 8.** Tiling of RT-PCR products covering the whole *Plasmodium yoelii* HECT E3 ligase gene. The arrows on top of the gels indicate primer positions and directions used in the amplification. YM and N67, amplified from cDNA samples of the two parental parasites; gDNA, amplification products from genomic YM DNA. Primers 15 and 16 produced an additional band smaller than that of the genomic band, suggesting alternative splicing.

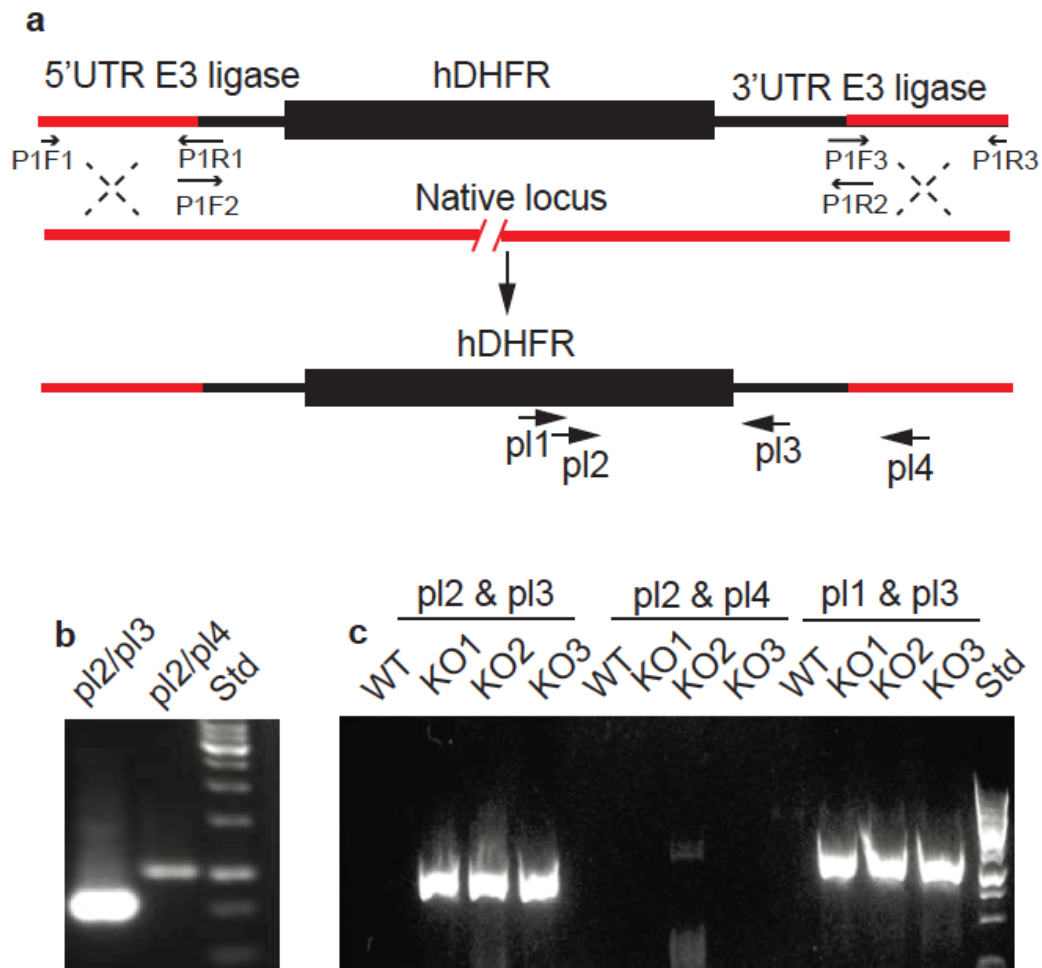

**Supplementary Fig. 9.** Attempts to disrupt the *Plasmodium yoelii* HECT E3 ubiquitin ligase gene. **(a)** Diagrams showing a linear construct for the insertion of a drug cassette into the HECT E3 ubiquitin ligase gene. The linear construct was made by assembly of PCR products using methods as described<sup>3,4</sup>. **(b)** PCR products from uncloned parasites before drug selection using primers as indicated in **(a)**. **(c)** PCR products from parasites of three independent transfections after drug selection using primers as indicated.

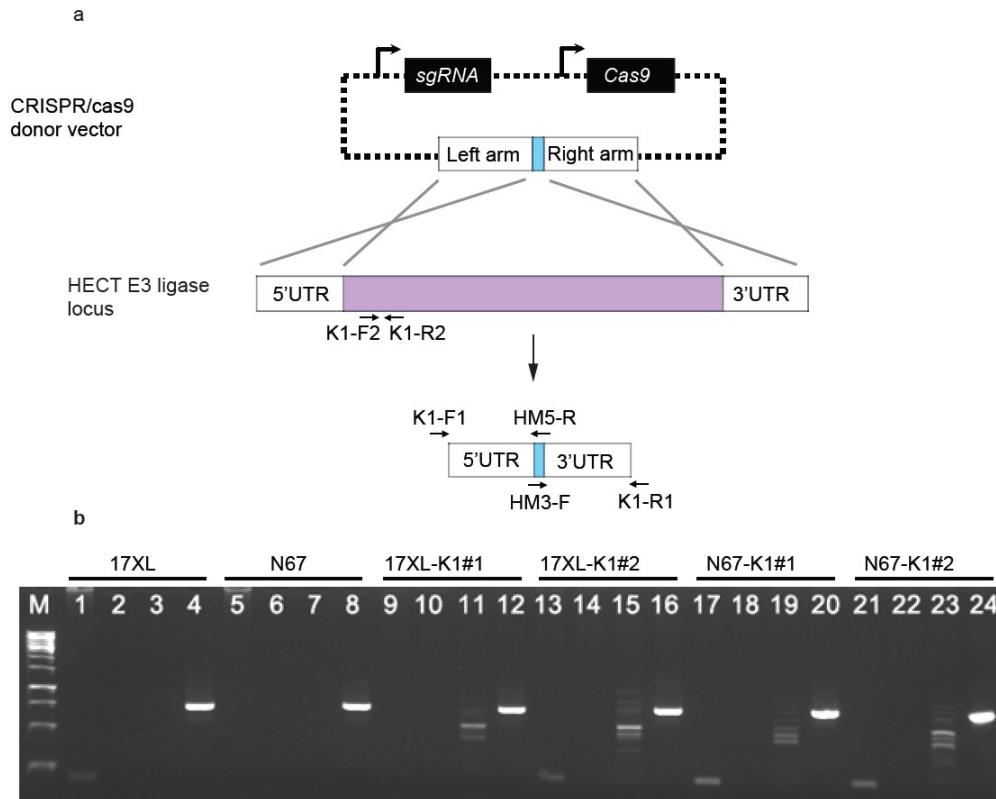

**Supplementary Fig. 10.** Attempts to disrupt the *Plasmodium yoelii* HECT E3 ubiquitin ligase gene. A CRISPR/Cas9 strategy was used to disrupt the gene as described<sup>5</sup>. **(a)** Diagram showing plasmid map with left and right arms from 5' untranslated region (5'UTR, 679 bp) and 3'UTR (699 bp) of the *Pyheul* gene as homologous DNA templates. Primers used in PCR amplification are as indicated, and their sequences are listed in Supplementary Table 5. The middle inserted sequence (HM5-R: CGATTAGCGTCCGCGGGGACCAT; HM3-F: ACGCTAATCGTAGCTAGCCTGCT) is used as a primer site for verification of sequence integration into parasite chromosome. **(b)** PCR products amplified from 17XL, N67, and uncloned transfected parasites. Primer pairs and gel lanes are as following: K1-F1/K1-R1 (lane 1, 5, 9, 13, 17, 21); K1-F1/HM5-R (lane 2, 6, 10, 14, 18, 22); HM3-F/K1-R1 (lane 3, 7, 11, 15, 19, 23); K1-F2/K1-R2 (lane 4, 8, 12, 16, 20, 24).

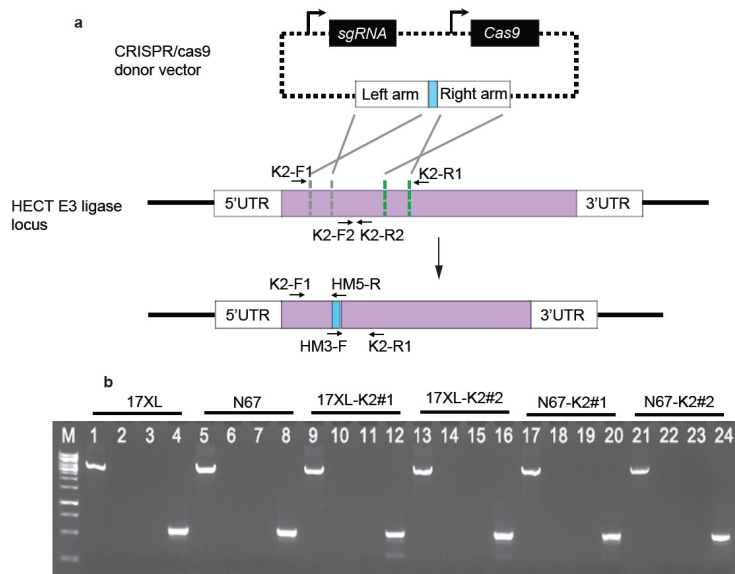

**Supplementary Fig. 11.** Attempts to replace partial *Plasmodium yoelii* HECT E3 ubiquitin ligase gene sequence to disrupt the gene. A CRISPR/Cas9 strategy was used to disrupt the *Pyheul* gene as described <sup>5</sup>. **(a)** Diagram showing plasmid map with left and right arms from the coding regions (left arm, 658 bp, position from 835-1,492 bp; right arm, 749 bp, from 3,866-4,614 bp) of the *Pyheul* gene as homologous DNA templates. Primers used in PCR amplification are as indicated, and their sequences are listed in Supplementary Table 5. The middle inserted sequence (HM5-R: CGATTAGCGTCCGCGGGGACCAT; HM3-F: ACGCTAATCGTAGCTAGCCTGCT) is used as a primer site for verification of sequence integration into parasite chromosome. **(b)** PCR products amplified from 17XL, N67, and uncloned transfected parasites. Primer pair K2-F1/K2-R1, lane 1, 5, 9, 13, 17, 21; primer pair K2-F1/HM5-R, lane 2, 6, 10, 14, 18, 22; primer pair HM3-F/K2-R1, lane 3, 7, 11, 15, 19, 23; primer pair K2-F2/K2-R2, lane 4, 8, 12, 16, 20, 24.

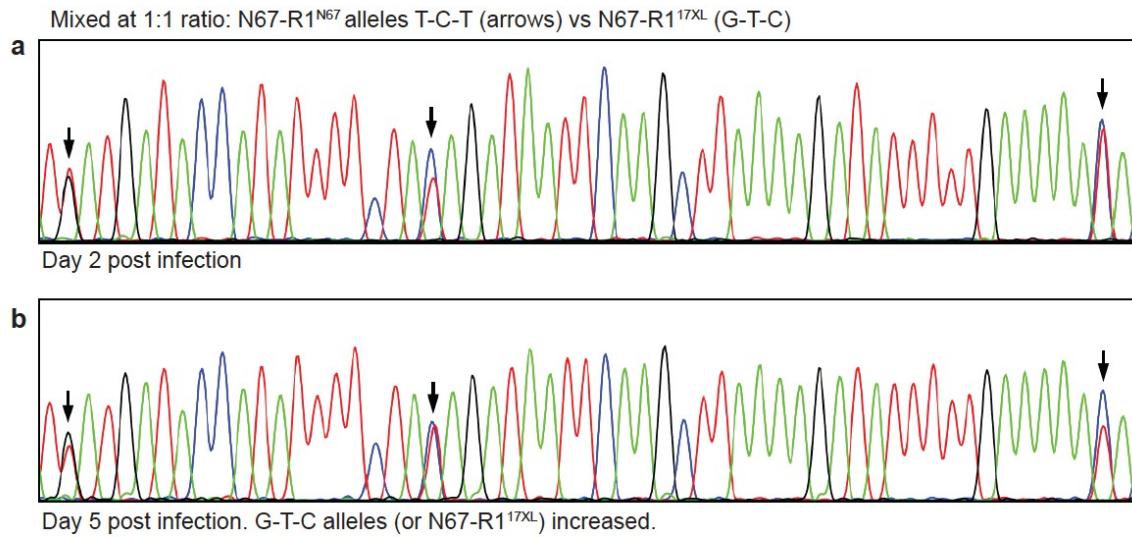

**Supplementary Fig. 12.** Electropherograms of DNA sequences from a mouse infected with a mixture of two isogenic parasites. Parasites (N67-R1<sup>17XL</sup> and N67-R1<sup>N67</sup>) at 1:1 ratio ( $1 \times 10^5$  each) were mixed and injected into a mouse. Bloods were collected on day 2 (**a**) and day 4 (**b**) post infection. DNA samples were prepared, PCR amplified the target region, and sequenced commercially. Similar results were obtained from a repeated experiment. Note the G-T-C alleles increased on day 4.

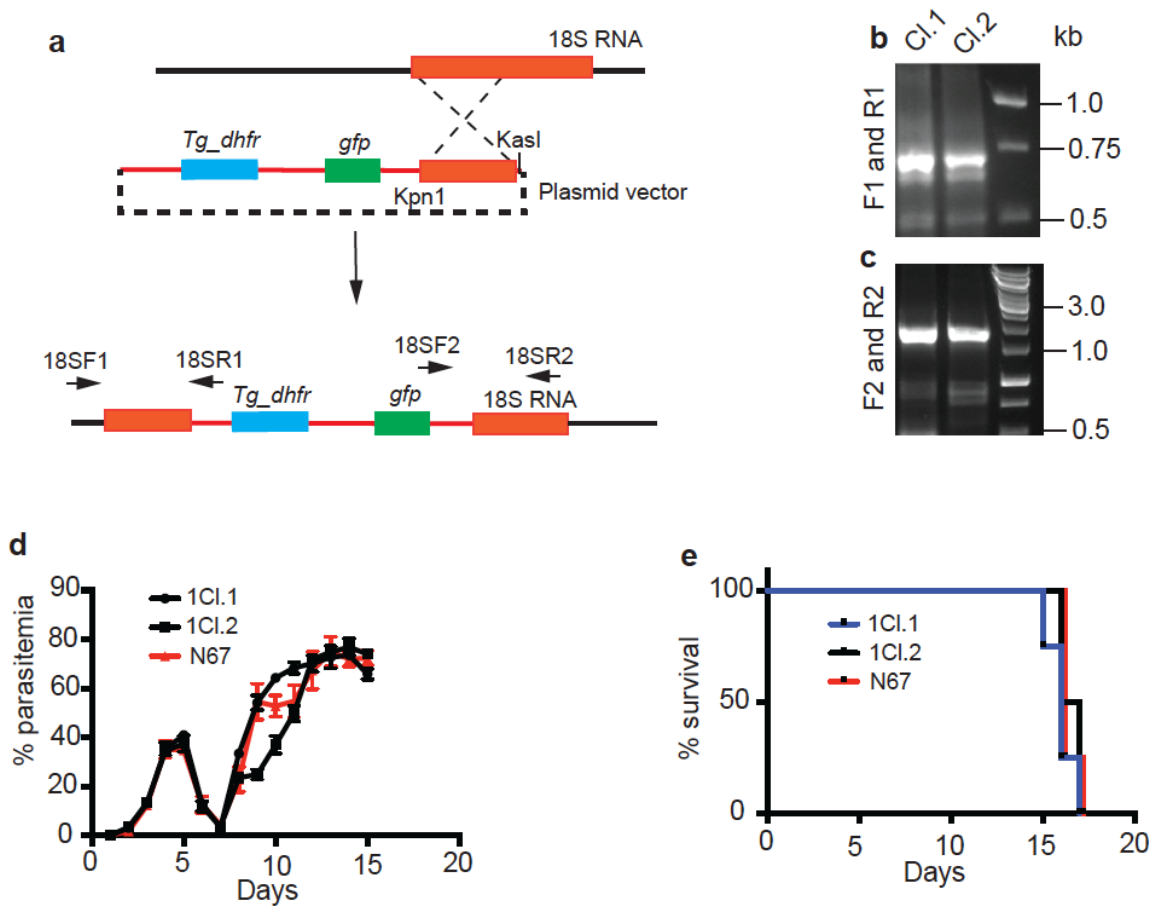

**Supplementary Fig. 13.** Insertion of a drug cassette into the 18S rRNA gene of *Plasmodium yoelii nigeriensis* N67. **(a)** A diagram showing the insertion sites of the drug cassette. *Tg\_dhfr*, *Toxoplasma gondii* dihydrofolate reductase; *gfp*, green fluorescent protein. **(b-c)** PCR products from two parasite clones after drug selection and parasite cloning. Primers used are as indicated. In each case, one primer is on the parasite chromosome, and the other one is on the drug cassette. **(d)** Parasitemia of mice infected with N67 and the two parasite clones. **(e)**, Mortality rate of N67 and the two clones.



**Supplementary Table 1.** Histological observations of mouse organs infected with *Plasmodium y. nigeriensis* N67 and *P. yoelii yoelii* YM parasites

| Pathology # | Animal # | Mouse strain | Parasite strain      | Days post infection | Lung                                                                                                                                                                                       | Thymus                              | Liver                                                                                                                                                          | Spleen                                                                                                                                                             | Kidney                                               | GI tract | Brain                                                                           | Spinal cord |
|-------------|----------|--------------|----------------------|---------------------|--------------------------------------------------------------------------------------------------------------------------------------------------------------------------------------------|-------------------------------------|----------------------------------------------------------------------------------------------------------------------------------------------------------------|--------------------------------------------------------------------------------------------------------------------------------------------------------------------|------------------------------------------------------|----------|---------------------------------------------------------------------------------|-------------|
| 130184      | 3        | C57BL/6      | <i>P. yoelii</i> YM  | 4                   | there are increased numbers of mononuclear cells within the alveolar walls; capillaries are congested and contain pigmented RBCs and phagocytes;                                           | n/a                                 | there are multiple foci of acute hepatocellular necrosis; there are moderate numbers of particle pigmented (hemozoin-laden) Kupffer cells, phagocytes and RBCs | there is mild/moderate lymphoid necrosis and increased numbers of particle pigmented (hemozoin-laden) macrophages and RBCs                                         | wnl                                                  | wnl      | few blood vessels are congested and contain increased numbers of pigmented RBCs | wnl         |
| 130185      | 4        | C57BL/6      | <i>P. yoelii</i> YM  | 4                   | there are increased numbers of mononuclear cells within the alveolar walls; capillaries are congested and contain pigmented RBCs and phagocytes; there is mild fibrin and edema in alveoli | There is moderate lymphoid necrosis | there are moderate numbers of particle pigmented (hemozoin-laden) Kupffer cells, phagocytes and RBCs                                                           | the spleen is enlarged and there is moderate lymphoid hyperplasia; increased numbers of particle pigmented (hemozoin-laden) macrophages and RBCs; and moderate EMH | there are large numbers of pigmented RBCs in vessels | wnl      | there are a few small foci of hemorrhage                                        | wnl         |
| 130186      | 3        | C57BL/6      | <i>P. yoelii</i> N67 | 4                   | there are increased numbers of mononuclear cells within the alveolar walls; capillaries are congested and contain pigmented RBCs and phagocytes;                                           | wnl                                 | there are moderate numbers of particle pigmented (hemozoin-laden) Kupffer cells, phagocytes and RBCs                                                           | the spleen is enlarged and there is mild/moderate lymphoid hyperplasia; increased numbers of particle pigmented (hemozoin-laden) macrophages and RBCs              | wnl                                                  | wnl      | wnl                                                                             | wnl         |
| 130187      | 4        | C57BL/6      | <i>P. yoelii</i> N67 | 4                   | there are increased numbers of mononuclear cells within the alveolar walls; capillaries are congested and contain pigmented RBCs and phagocytes;                                           | n/a                                 | there are moderate numbers of particle pigmented (hemozoin-laden) Kupffer cells, phagocytes and RBCs; moderate EMH                                             | the spleen is enlarged and there is mild/moderate lymphoid hyperplasia; increased numbers of particle pigmented (hemozoin-laden) macrophages and RBCs              | there are large numbers of pigmented RBCs in vessels | wnl      | wnl                                                                             | wnl         |
| 130188      | 5        | C57BL/6      | <i>P. yoelii</i> YM  | 7                   | there are increased numbers of mononuclear cells within the alveolar walls; capillaries are congested and contain pigmented RBCs and phagocytes; there is mild edema and fibrin            | There is mild lymphoid necrosis     | there are moderate numbers of particle pigmented (hemozoin-laden) Kupffer cells, phagocytes and RBCs; moderate EMH                                             | the spleen is enlarged and there is moderate lymphoid hyperplasia, histiocytosis and EMH                                                                           | wnl                                                  | wnl      | wnl                                                                             | wnl         |
| 130189      | 6        | C57BL/6      | <i>P. yoelii</i> YM  | 7                   | there are increased numbers of mononuclear cells within the alveolar walls; capillaries are congested and contain pigmented RBCs and phagocytes;                                           | There is mild lymphoid necrosis     | there are moderate numbers of particle pigmented (hemozoin-laden) Kupffer cells, phagocytes and RBCs; extensive EMH                                            | the spleen is very enlarged and extensive histiocytosis                                                                                                            | wnl                                                  | wnl      | there are a few small foci of hemorrhage                                        | wnl         |
| 130190      | 7        | C57BL/6      | <i>P. yoelii</i> YM  | 7                   | wnl                                                                                                                                                                                        | There is severe lymphoid necrosis   | there are multiple foci of acute hepatocellular necrosis; there are moderate numbers of particle pigmented (hemozoin-laden) Kupffer cells, phagocytes and RBCs | the spleen is very enlarged and there is extensive histiocytosis with lymphoid hyperplasia                                                                         | wnl                                                  | wnl      | there is one small focus of hemorrhage                                          | wnl         |
| 130191      | 5        | C57BL/6      | <i>P. yoelii</i> N67 | 7                   | multifocally, there is moderate to severe interstitial pneumonia                                                                                                                           | There is severe lymphoid necrosis   | there are moderate numbers of particle pigmented (hemozoin-laden) Kupffer cells, phagocytes and RBCs; mild EMH                                                 | the spleen is very enlarged and there is extensive histiocytosis with lymphoid hyperplasia; increased numbers of particle pigmented (hemozoin-laden) macrophages   | wnl                                                  | wnl      | wnl                                                                             | wnl         |
| 130192      | 6        | C57BL/6      | <i>P. yoelii</i> N67 | 7                   | there are increased numbers of mononuclear cells within the alveolar walls; capillaries are congested and contain pigmented RBCs and phagocytes;                                           | There is severe lymphoid necrosis   | there are moderate numbers of particle pigmented (hemozoin-laden) Kupffer cells, phagocytes and RBCs; mild EMH                                                 | the spleen is very enlarged and there is extensive histiocytosis with lymphoid hyperplasia; increased numbers of particle pigmented (hemozoin-laden) macrophages   | wnl                                                  | wnl      | there are a few small foci of hemorrhage                                        | wnl         |
| 130193      | 7        | C57BL/6      | <i>P. yoelii</i> N67 | 7                   | there are increased numbers of mononuclear cells within the alveolar walls; capillaries are congested and contain pigmented RBCs and phagocytes;                                           | There is severe lymphoid necrosis   | there are moderate numbers of particle pigmented (hemozoin-laden) Kupffer cells, phagocytes and RBCs; mild EMH                                                 | the spleen is very enlarged and there is extensive histiocytosis with lymphoid hyperplasia; increased numbers of particle pigmented (hemozoin-laden) macrophages   | wnl                                                  | w        | wnl                                                                             | wnl         |

EMH= extramedullary hematopoiesis  
wnl, within normal limit

**Supplementary Table 2.** Microsatellite markers and their primer sequences used in the initial typing of the progeny

| Marker | Sequence size (bp) | Py chr. | YM (bp) | N67 (bp) | Motif   | Forward primer            | Reverse primer           |
|--------|--------------------|---------|---------|----------|---------|---------------------------|--------------------------|
| Py183  | 139                | chr13   | 155     | 114      | AT      | 5'TATCCTTTGTGTCAGGTAA3'   | 5'GTGAATAATTGAATAGGTTG3' |
| Py718  | 128                | chr9    | 145     | 179      | AAAT/AT | 5'CACTTGATCTTTCCAACC3'    | 5'TGTTGAAATTGAAGAATCAC3' |
| Py1352 | 234                | chr7    | 253     | 358      | CAT     | 5'GACTTAAAATGTAGTTCAAG3'  | 5'ATGAATCCACTGACTTCG3'   |
| Py1414 | 207                | chr4    | 225     | 134      | AAT     | 5'AACAAAACAGGTAGCAACA3'   | 5'ATCATGGTTTATATTCACAG3' |
| Py1458 | 138                | chr14   | 156     | 104      | AT      | 5'CGCTTTTTTATGCGTATAC3'   | 5'TTAAGTATCAATTGGACGG3'  |
| Py1654 | 175                | chr8    | 193     | 247      | AT/T    | 5'TGACAACAATGGTAACTCT3'   | 5'TCGTTTCAATAAGGTCATC3'  |
| Py1685 | 145                | chr6    | 163     | 117      | TATG/TA | 5'AAAATTTAATCTTATCTCCGT3' | 5'ATGTGTTACTCATGCGAC3'   |
| Py1788 | 143                | chr5    | 155     | 228      | A       | 5'GATGCTAAAATAGAATTAGC3'  | 5'TGGTAATTCGATTATCAGT3'  |
| Py1836 | 172                | chr10   | 189     | 123      | AT      | 5'CTTACTATTCGCAAAGTTG3'   | 5'ATCTTCTTGTAGGTTTCGA3'  |
| Py2260 | 238                | chr12   | 243     | 201      | CATA    | 5'TAGCAGCATATTCCTTGC3'    | 5'ATGGCTTCTTCCAATAAGT3'  |

Note: py chr, *Plasmodium yoelii* chromosome; YM (bp), PCR product sizes in basepairs from YM parasite; N67 (bp), PCR product sizes in base pair from N67 parasite; moAf, repeaAng moAfs of the microsatellites.

**Supplementary Table 3.** Candidate genes in the chromosome 1 locus

| Gene ID      | Genomic Location                  | Product Description | Protein Length | # TM Domains | SignalP Scores |
|--------------|-----------------------------------|---------------------|----------------|--------------|----------------|
| PYYM_0115900 | PyYM_01_v1: 622,336 - 624,444 (+) | YIR protein         | 632            | 2            | No             |
| PYYM_0116000 | PyYM_01_v1: 624,944 - 626,063 (-) | fam-a protein       | 205            | 0            | No             |
| PYYM_0116100 | PyYM_01_v1: 628,961 - 629,639 (-) | fam-a protein       | 146            | 0            | Yes            |
| PYYM_0116200 | PyYM_01_v1: 632,522 - 636,127 (+) | YIR protein         | 1131           | 2            | No             |
| PYYM_0116300 | PyYM_01_v1: 636,951 - 638,074 (-) | fam-a protein       | 224            | 0            | Yes            |

**Supplementary Table 3.** Candidate genes in the chromosome 8 locus

|              |                                 |             |     |   |    |
|--------------|---------------------------------|-------------|-----|---|----|
| PYYM_0800300 | PyYM_08_v1: 10,030 - 11,045 (-) | YIR protein | 270 | 1 | No |
| PYYM_0800400 | PyYM_08_v1: 13,672 - 14,969 (-) | YIR protein | 264 | 0 | No |
| PYYM_0800500 | PyYM_08_v1: 17,880 - 18,984 (-) | YIR protein | 303 | 1 | No |
| PYYM_0800600 | PyYM_08_v1: 21,744 - 22,913 (-) | YIR protein | 309 | 1 | No |
| PYYM_0800700 | PyYM_08_v1: 25,194 - 26,209 (-) | YIR protein | 269 | 1 | No |
| PYYM_0800800 | PyYM_08_v1: 28,764 - 29,951 (-) | YIR protein | 320 | 1 | No |
| PYYM_0800900 | PyYM_08_v1: 32,345 - 33,491 (-) | YIR protein | 307 | 1 | No |

**SupplementaryTable 4.** Nucleotide and amino acid differences in the *Plasmodium yoelii* HECT E3 ligase gene between *Plasmodium y. nigeriensis* N67 and *P. y. yoelii* YM.

| Chromosome 7 | Position | Cl.13  | Cl.35  | Cl.49  | YM      | N67    | Depth  | Coding-synonymous nonsynonymous  | Mutation | Codon change        | AA change  |
|--------------|----------|--------|--------|--------|---------|--------|--------|----------------------------------|----------|---------------------|------------|
| PyYM_07_v1   | 182821   | 182821 | 182821 | 182821 | A       | G      | DP=330 | SYNONYMOUS_CODING                | SILENT   | tcA/tcG             | S52        |
| PyYM_07_v1   | 182940   | 182940 | 182940 | 182940 | G       | A      | DP=219 | NON_SYNONYMOUS_CODING            | MISSENSE | gGc/gAc             | G92D       |
| PyYM_07_v1   | 182941   | 182941 | 182941 | 182941 | C       | T      | DP=216 | SYNONYMOUS_CODING                | SILENT   | ggC/ggT             | G92        |
| PyYM_07_v1   | 182944   | 182944 | 182944 | 182944 | T       | C      | DP=236 | SYNONYMOUS_CODING                | SILENT   | aaT/aaC             | N93        |
| PyYM_07_v1   | 182960   | 182960 | 182960 | 182960 | A       | G      | DP=281 | NON_SYNONYMOUS_CODING            | MISSENSE | Aca/Gca             | T99A       |
| PyYM_07_v1   | 182963   | 182963 | 182963 | 182963 | T       | A      | DP=275 | NON_SYNONYMOUS_CODING            | MISSENSE | Tgt/Agt             | C100S      |
| PyYM_07_v1   | 182965   | 182965 | 182965 | 182965 | T       | C      | DP=278 | SYNONYMOUS_CODING                | SILENT   | tgT/tgC             | C100       |
| PyYM_07_v1   | 182974   | 182974 | 182974 | 182974 | C       | T      | DP=319 | SYNONYMOUS_CODING                | SILENT   | atC/atT             | I103       |
| PyYM_07_v1   | 182995   | 182995 | 182995 | 182995 | G       | A      | DP=356 | SYNONYMOUS_CODING                | SILENT   | caG/caA             | Q110       |
| PyYM_07_v1   | 183049   | 183049 | 183049 | 183049 | T       | C      | DP=357 | SYNONYMOUS_CODING                | SILENT   | aaT/aaC             | N128       |
| PyYM_07_v1   | 183166   | 183166 | 183166 | 183166 | G       | C      | DP=325 | SYNONYMOUS_CODING                | SILENT   | acG/acC             | T167       |
| PyYM_07_v1   | 183293   | 183293 | 183293 | 183293 | A       | G      | DP=336 | NON_SYNONYMOUS_CODING            | MISSENSE | Ata/Gta             | I210V      |
| PyYM_07_v1   | 183580   | 183580 | 183580 | 183580 | A       | G      | DP=336 | SYNONYMOUS_CODING                | SILENT   | aaA/aaG             | K305       |
| PyYM_07_v1   | 183607   | 183607 | 183607 | 183607 | T       | C      | DP=345 | SYNONYMOUS_CODING                | SILENT   | tgT/tgC             | C314       |
| PyYM_07_v1   | 184015   | 184015 | 184015 | 184015 | C       | A      | DP=369 | NON_SYNONYMOUS_CODING            | MISSENSE | ttC/ttA             | F450L      |
| PyYM_07_v1   | 184024   | 184024 | 184024 | 184024 | T       | C      | DP=366 | SYNONYMOUS_CODING                | SILENT   | tcT/tcC             | S453       |
| PyYM_07_v1   | 184026   | 184026 | 184026 | 184026 | T       | C      | DP=365 | NON_SYNONYMOUS_CODING            | MISSENSE | aTa/aCa             | I454T      |
| PyYM_07_v1   | 184091   | 184091 | 184091 | 184091 | G       | A      | DP=347 | NON_SYNONYMOUS_CODING            | MISSENSE | Gtt/Att             | V476I      |
| PyYM_07_v1   | 184161   | 184161 | 184161 | 184161 | A       | T      | DP=336 | NON_SYNONYMOUS_CODING            | MISSENSE | cAt/cTt             | H499L      |
| PyYM_07_v1   | 184173   | 184173 | 184173 | 184173 | G       | C      | DP=349 | NON_SYNONYMOUS_CODING            | MISSENSE | gGt/gCt             | G503A      |
| PyYM_07_v1   | 184186   | 184186 | 184186 | 184186 | G       | A      | DP=346 | SYNONYMOUS_CODING                | SILENT   | tcG/tcA             | S507       |
| PyYM_07_v1   | 184261   | 184261 | 184261 | 184261 | C       | T      | DP=309 | SYNONYMOUS_CODING                | SILENT   | gaC/gaT             | D532       |
| PyYM_07_v1   | 184286   | 184286 | 184286 | 184286 | G       | A      | DP=269 | NON_SYNONYMOUS_CODING            | MISSENSE | Gta/Ata             | V541I      |
| PyYM_07_v1   | 184295   | 184295 | 184295 | 184295 | T       | C      | DP=264 | NON_SYNONYMOUS_CODING            | MISSENSE | Tca/Cca             | S544P      |
| PyYM_07_v1   | 184314   | 184314 | 184314 | 184314 | T       | C      | DP=283 | NON_SYNONYMOUS_CODING            | MISSENSE | tTa/tCa             | L550S      |
| PyYM_07_v1   | 184318   | 184318 | 184318 | 184318 | T       | C      | DP=292 | SYNONYMOUS_CODING                | SILENT   | caT/caC             | H551       |
| PyYM_07_v1   | 184340   | 184340 | 184340 | 184340 | G       | T      | DP=301 | NON_SYNONYMOUS_CODING            | MISSENSE | Gta/Tta             | V559L      |
| PyYM_07_v1   | 184341   | 184341 | 184341 | 184341 | T       | C      | DP=305 | NON_SYNONYMOUS_CODING            | MISSENSE | gTa/gCa             | V559A      |
| PyYM_07_v1   | 184772   | 184772 | 184772 | 184772 | C       | T      | DP=294 | SYNONYMOUS_CODING                | SILENT   | Cta/Tta             | L703       |
| PyYM_07_v1   | 184861   | 184861 | 184861 | 184861 | A       | G      | DP=381 | SYNONYMOUS_CODING                | SILENT   | gaA/gaG             | E732       |
| PyYM_07_v1   | 184987   | 184987 | 184987 | 184987 | C       | T      | DP=323 | SYNONYMOUS_CODING                | SILENT   | gaC/gaT             | D774       |
| PyYM_07_v1   | 185061   | 185061 | 185061 | 185061 | GTAATAA | GTAATA | DP=229 | CODON_CHANGE_PLUS_CODON_DELETION |          | aataatgataatacc/acc | NNDNT801 T |
| PyYM_07_v1   | 185101   | 185101 | 185101 | 185101 | C       | T      | DP=285 | SYNONYMOUS_CODING                | SILENT   | agC/agT             | S812       |
| PyYM_07_v1   | 185117   | 185117 | 185117 | 185117 | A       | T      | DP=280 | NON_SYNONYMOUS_CODING            | MISSENSE | Acc/Tcc             | T818S      |
| PyYM_07_v1   | 185189   | 185189 | 185189 | 185189 | G       | T      | DP=332 | NON_SYNONYMOUS_CODING            | MISSENSE | Gat/Tat             | D842Y      |
| PyYM_07_v1   | 185208   | 185208 | 185208 | 185208 | T       | C      | DP=370 | NON_SYNONYMOUS_CODING            | MISSENSE | aTa/aCa             | I848T      |
| PyYM_07_v1   | 185243   | 185243 | 185243 | 185243 | C       | T      | DP=386 | NON_SYNONYMOUS_CODING            | MISSENSE | Cac/Tac             | H860Y      |
| PyYM_07_v1   | 185395   | 185395 | 185395 | 185395 | A       | T      | DP=314 | SYNONYMOUS_CODING                | SILENT   | acA/acT             | T910       |
| PyYM_07_v1   | 185431   | 185431 | 185431 | 185431 | A       | C      | DP=295 | SYNONYMOUS_CODING                | SILENT   | gtA/gtC             | V922       |
| PyYM_07_v1   | 185467   | 185467 | 185467 | 185467 | A       | G      | DP=310 | SYNONYMOUS_CODING                | SILENT   | aaA/aaG             | K934       |
| PyYM_07_v1   | 185623   | 185623 | 185623 | 185623 | T       | A      | DP=340 | SYNONYMOUS_CODING                | SILENT   | atT/atA             | I986       |
| PyYM_07_v1   | 185695   | 185695 | 185695 | 185695 | T       | C      | DP=321 | SYNONYMOUS_CODING                | SILENT   | taT/taC             | Y1010      |
| PyYM_07_v1   | 185704   | 185704 | 185704 | 185704 | C       | T      | DP=360 | SYNONYMOUS_CODING                | SILENT   | ggC/ggT             | N1043      |

|            |        |        |        |        |   |   |        |                       |          |         |        |
|------------|--------|--------|--------|--------|---|---|--------|-----------------------|----------|---------|--------|
| PyYM_07_v1 | 186412 | 186412 | 186412 | 186412 | A | C | DP=329 | NON_SYNONYMOUS_CODING | MISSENSE | ttA/ttC | L1249F |
| PyYM_07_v1 | 186563 | 186563 | 186563 | 186563 | T | C | DP=321 | SYNONYMOUS_CODING     | SILENT   | Tta/Cta | L1300  |
| PyYM_07_v1 | 187006 | 187006 | 187006 | 187006 | C | T | DP=324 | SYNONYMOUS_CODING     | SILENT   | gtC/gtT | V1447  |
| PyYM_07_v1 | 187102 | 187102 | 187102 | 187102 | T | C | DP=342 | SYNONYMOUS_CODING     | SILENT   | taT/taC | Y1479  |
| PyYM_07_v1 | 187330 | 187330 | 187330 | 187330 | C | T | DP=305 | SYNONYMOUS_CODING     | SILENT   | aaC/aaT | N1555  |
| PyYM_07_v1 | 187681 | 187681 | 187681 | 187681 | C | A | DP=321 | SYNONYMOUS_CODING     | SILENT   | tcC/tcA | S1672  |
| PyYM_07_v1 | 187832 | 187832 | 187832 | 187832 | G | C | DP=309 | NON_SYNONYMOUS_CODING | MISSENSE | Gaa/Caa | E1723Q |
| PyYM_07_v1 | 188005 | 188005 | 188005 | 188005 | G | A | DP=334 | SYNONYMOUS_CODING     | SILENT   | gtG/gtA | V1780  |
| PyYM_07_v1 | 188061 | 188061 | 188061 | 188061 | C | T | DP=274 | NON_SYNONYMOUS_CODING | MISSENSE | cCc/cTc | P1799L |
| PyYM_07_v1 | 188123 | 188123 | 188123 | 188123 | A | C | DP=315 | NON_SYNONYMOUS_CODING | MISSENSE | Aag/Cag | K1820Q |
| PyYM_07_v1 | 188147 | 188147 | 188147 | 188147 | C | A | DP=312 | NON_SYNONYMOUS_CODING | MISSENSE | Cac/Aac | H1828N |
| PyYM_07_v1 | 188176 | 188176 | 188176 | 188176 | T | C | DP=306 | SYNONYMOUS_CODING     | SILENT   | aaT/aaC | N1837  |
| PyYM_07_v1 | 188182 | 188182 | 188182 | 188182 | A | G | DP=289 | NON_SYNONYMOUS_CODING | MISSENSE | atA/atG | I1839M |
| PyYM_07_v1 | 188284 | 188284 | 188284 | 188284 | T | C | DP=358 | SYNONYMOUS_CODING     | SILENT   | ccT/ccC | P1873  |
| PyYM_07_v1 | 188423 | 188423 | 188423 | 188423 | C | T | DP=254 | NON_SYNONYMOUS_CODING | MISSENSE | Cct/Tct | P1920S |
| PyYM_07_v1 | 188544 | 188544 | 188544 | 188544 | A | G | DP=299 | NON_SYNONYMOUS_CODING | MISSENSE | aAt/aGt | N1960S |
| PyYM_07_v1 | 188596 | 188596 | 188596 | 188596 | A | G | DP=369 | SYNONYMOUS_CODING     | SILENT   | ttA/ttG | L1977  |
| PyYM_07_v1 | 188767 | 188767 | 188767 | 188767 | C | T | DP=247 | SYNONYMOUS_CODING     | SILENT   | aaC/aaT | N2034  |
| PyYM_07_v1 | 189067 | 189067 | 189067 | 189067 | C | T | DP=313 | SYNONYMOUS_CODING     | SILENT   | aaC/aaT | N2134  |
| PyYM_07_v1 | 189073 | 189073 | 189073 | 189073 | A | T | DP=302 | NON_SYNONYMOUS_CODING | MISSENSE | caA/caT | Q2136H |
| PyYM_07_v1 | 189091 | 189091 | 189091 | 189091 | T | C | DP=293 | SYNONYMOUS_CODING     | SILENT   | aaT/aaC | N2142  |
| PyYM_07_v1 | 189106 | 189106 | 189106 | 189106 | C | T | DP=308 | SYNONYMOUS_CODING     | SILENT   | gaC/gaT | D2147  |
| PyYM_07_v1 | 189117 | 189117 | 189117 | 189117 | T | C | DP=275 | NON_SYNONYMOUS_CODING | MISSENSE | gTc/gCc | V2151A |
| PyYM_07_v1 | 189118 | 189118 | 189118 | 189118 | C | T | DP=276 | SYNONYMOUS_CODING     | SILENT   | gtC/gtT | V2151  |
| PyYM_07_v1 | 189120 | 189120 | 189120 | 189120 | G | A | DP=280 | NON_SYNONYMOUS_CODING | MISSENSE | aGt/aAt | S2152N |
| PyYM_07_v1 | 189125 | 189125 | 189125 | 189125 | G | A | DP=319 | NON_SYNONYMOUS_CODING | MISSENSE | Gtt/Att | V2154I |
| PyYM_07_v1 | 189128 | 189128 | 189128 | 189128 | T | C | DP=317 | NON_SYNONYMOUS_CODING | MISSENSE | Tca/Cca | S2155P |
| PyYM_07_v1 | 189154 | 189154 | 189154 | 189154 | C | T | DP=300 | SYNONYMOUS_CODING     | SILENT   | gaC/gaT | D2163  |
| PyYM_07_v1 | 189253 | 189253 | 189253 | 189253 | G | C | DP=383 | SYNONYMOUS_CODING     | SILENT   | tcG/tcC | S2196  |
| PyYM_07_v1 | 189436 | 189436 | 189436 | 189436 | T | C | DP=309 | SYNONYMOUS_CODING     | SILENT   | ttT/ttC | F2257  |
| PyYM_07_v1 | 189930 | 189930 | 189930 | 189930 | C | T | DP=374 | NON_SYNONYMOUS_CODING | MISSENSE | cCa/cTa | P2422L |
| PyYM_07_v1 | 190087 | 190087 | 190087 | 190087 | C | T | DP=377 | SYNONYMOUS_CODING     | SILENT   | aaC/aaT | N2474  |
| PyYM_07_v1 | 190158 | 190158 | 190158 | 190158 | T | C | DP=323 | NON_SYNONYMOUS_CODING | MISSENSE | aTa/aCa | I2498T |
| PyYM_07_v1 | 190432 | 190432 | 190432 | 190432 | A | G | DP=305 | SYNONYMOUS_CODING     | SILENT   | aaA/aaG | K2589  |
| PyYM_07_v1 | 190843 | 190843 | 190843 | 190843 | A | C | DP=170 | NON_SYNONYMOUS_CODING | MISSENSE | caA/caC | Q2726H |
| PyYM_07_v1 | 190856 | 190856 | 190856 | 190856 | G | A | DP=204 | NON_SYNONYMOUS_CODING | MISSENSE | Gca/Aca | A2731T |
| PyYM_07_v1 | 190882 | 190882 | 190882 | 190882 | T | C | DP=320 | SYNONYMOUS_CODING     | SILENT   | atT/atC | I2739  |
| PyYM_07_v1 | 190904 | 190904 | 190904 | 190904 | G | A | DP=312 | NON_SYNONYMOUS_CODING | MISSENSE | Ggt/Agt | G2747S |
| PyYM_07_v1 | 190905 | 190905 | 190905 | 190905 | G | A | DP=308 | NON_SYNONYMOUS_CODING | MISSENSE | gGt/gAt | G2747D |
| PyYM_07_v1 | 190982 | 190982 | 190982 | 190982 | G | C | DP=281 | NON_SYNONYMOUS_CODING | MISSENSE | Gca/Cca | A2773P |
| PyYM_07_v1 | 191026 | 191026 | 191026 | 191026 | A | G | DP=294 | SYNONYMOUS_CODING     | SILENT   | tcA/tcG | S2787  |
| PyYM_07_v1 | 191083 | 191083 | 191083 | 191083 | C | G | DP=308 | NON_SYNONYMOUS_CODING | MISSENSE | gaC/gaG | D2806E |
| PyYM_07_v1 | 191107 | 191107 | 191107 | 191107 | T | C | DP=334 | SYNONYMOUS_CODING     | SILENT   | atT/atC | I2814  |
| PyYM_07_v1 | 191115 | 191115 | 191115 | 191115 | G | A | DP=345 | NON_SYNONYMOUS_CODING | MISSENSE | aGt/aAt | S2817N |
| PyYM_07_v1 | 191125 | 191125 | 191125 | 191125 | T | C | DP=345 | SYNONYMOUS_CODING     | SILENT   | ccT/ccC | P2820  |
| PyYM_07_v1 | 191179 | 191179 | 191179 | 191179 | T | C | DP=388 | SYNONYMOUS_CODING     | SILENT   | aaT/aaC | N2838  |
| PyYM_07_v1 | 191205 | 191205 | 191205 | 191205 | G | T | DP=358 | NON_SYNONYMOUS_CODING | MISSENSE | gGt/gTt | G2847V |
| PyYM_07_v1 | 191285 | 191285 | 191285 | 191285 | C | A | DP=296 | NON_SYNONYMOUS_CODING | MISSENSE | Cta/Ata | L2874I |
| PyYM_07_v1 | 191461 | 191461 | 191461 | 191461 | T | C | DP=344 | SYNONYMOUS_CODING     | SILENT   | taT/taC | Y2932  |
| PyYM_07_v1 | 191658 | 191658 | 191658 | 191658 | T | C | DP=353 | NON_SYNONYMOUS_CODING | MISSENSE | gTt/gCt | V2998A |
| PyYM_07_v1 | 191662 | 191662 | 191662 | 191662 | C | T | DP=348 | SYNONYMOUS_CODING     | SILENT   | aaC/aaT | N2999  |

|            |        |        |        |         |           |        |                                  |          |            |         |
|------------|--------|--------|--------|---------|-----------|--------|----------------------------------|----------|------------|---------|
| PyYM_07_v1 | 191758 | 191758 | 191758 | G       | A         | DP=263 | SYNONYMOUS_CODING                | SILENT   | agG/agA    | R3031   |
| PyYM_07_v1 | 191791 | 191791 | 191791 | T       | A         | DP=313 | SYNONYMOUS_CODING                | SILENT   | ccT/ccA    | P3042   |
| PyYM_07_v1 | 191803 | 191803 | 191803 | G       | T         | DP=313 | SYNONYMOUS_CODING                | SILENT   | acG/acT    | T3046   |
| PyYM_07_v1 | 191809 | 191809 | 191809 | T       | G         | DP=302 | SYNONYMOUS_CODING                | SILENT   | tcT/tcG    | S3048   |
| PyYM_07_v1 | 191828 | 191828 | 191828 | A       | G         | DP=318 | NON_SYNONYMOUS_CODING            | MISSENSE | Att/Gtt    | I3055V  |
| PyYM_07_v1 | 191836 | 191836 | 191836 | C       | T         | DP=309 | SYNONYMOUS_CODING                | SILENT   | aaC/aaT    | N3057   |
| PyYM_07_v1 | 191841 | 191841 | 191841 | T       | C         | DP=316 | NON_SYNONYMOUS_CODING            | MISSENSE | aTt/aCt    | I3059T  |
| PyYM_07_v1 | 191850 | 191850 | 191850 | C       | T         | DP=331 | NON_SYNONYMOUS_CODING            | MISSENSE | gCt/gTt    | A3062V  |
| PyYM_07_v1 | 191861 | 191861 | 191861 | A       | G         | DP=330 | NON_SYNONYMOUS_CODING            | MISSENSE | Att/Gtt    | I3066V  |
| PyYM_07_v1 | 191938 | 191938 | 191938 | C       | T         | DP=343 | SYNONYMOUS_CODING                | SILENT   | ggC/ggT    | G3091   |
| PyYM_07_v1 | 191945 | 191945 | 191945 | G       | A         | DP=336 | NON_SYNONYMOUS_CODING            | MISSENSE | Gtt/Att    | V3094I  |
| PyYM_07_v1 | 191982 | 191982 | 191982 | G       | A         | DP=330 | NON_SYNONYMOUS_CODING            | MISSENSE | aGt/aAt    | S3106N  |
| PyYM_07_v1 | 192334 | 192334 | 192334 | A       | G         | DP=235 | SYNONYMOUS_CODING                | SILENT   | gaA/gaG    | E3223   |
| PyYM_07_v1 | 192553 | 192553 | 192553 | C       | T         | DP=325 | SYNONYMOUS_CODING                | SILENT   | gcC/gcT    | A3296   |
| PyYM_07_v1 | 192655 | 192655 | 192655 | C       | T         | DP=344 | SYNONYMOUS_CODING                | SILENT   | tTc/ttT    | F3330   |
| PyYM_07_v1 | 192663 | 192663 | 192663 | G       | A         | DP=352 | NON_SYNONYMOUS_CODING            | MISSENSE | tGc/tAc    | C3333Y  |
| PyYM_07_v1 | 192805 | 192805 | 192805 | A       | G         | DP=332 | SYNONYMOUS_CODING                | SILENT   | aaA/aaG    | K3380   |
| PyYM_07_v1 | 192974 | 192974 | 192974 | G       | A         | DP=352 | NON_SYNONYMOUS_CODING            | MISSENSE | Gct/Act    | A3437T  |
| PyYM_07_v1 | 192993 | 192993 | 192993 | G       | A         | DP=352 | NON_SYNONYMOUS_CODING            | MISSENSE | aGc/aAc    | S3443N  |
| PyYM_07_v1 | 193006 | 193006 | 193006 | A       | G         | DP=361 | SYNONYMOUS_CODING                | SILENT   | tcA/tcG    | S3447   |
| PyYM_07_v1 | 193132 | 193132 | 193132 | G       | A         | DP=383 | SYNONYMOUS_CODING                | SILENT   | caG/caA    | Q3489   |
| PyYM_07_v1 | 193245 | 193245 | 193245 | C       | T         | DP=340 | NON_SYNONYMOUS_CODING            | MISSENSE | tCa/tTa    | S3527L  |
| PyYM_07_v1 | 193246 | 193246 | 193246 | A       | G         | DP=338 | SYNONYMOUS_CODING                | SILENT   | tcA/tcG    | S3527   |
| PyYM_07_v1 | 193453 | 193453 | 193453 | C       | T         | DP=356 | SYNONYMOUS_CODING                | SILENT   | gaC/gaT    | D3596   |
| PyYM_07_v1 | 193478 | 193478 | 193478 | C       | G         | DP=351 | NON_SYNONYMOUS_CODING            | MISSENSE | Ctt/Gtt    | L3605V  |
| PyYM_07_v1 | 193489 | 193489 | 193489 | A       | G         | DP=350 | SYNONYMOUS_CODING                | SILENT   | ggA/ggG    | G3608   |
| PyYM_07_v1 | 193569 | 193569 | 193569 | G       | A         | DP=344 | NON_SYNONYMOUS_CODING            | MISSENSE | gGt/gAt    | G3635D  |
| PyYM_07_v1 | 193615 | 193615 | 193615 | G       | A         | DP=340 | SYNONYMOUS_CODING                | SILENT   | ttG/ttA    | L3650   |
| PyYM_07_v1 | 193633 | 193633 | 193633 | A       | C         | DP=340 | SYNONYMOUS_CODING                | SILENT   | atA/atC    | I3656   |
| PyYM_07_v1 | 193750 | 193750 | 193750 | T       | C         | DP=327 | SYNONYMOUS_CODING                | SILENT   | aaT/aaC    | N3695   |
| PyYM_07_v1 | 193778 | 193778 | 193778 | C       | A         | DP=332 | SYNONYMOUS_CODING                | SILENT   | Cga/Aga    | R3705   |
| PyYM_07_v1 | 193873 | 193873 | 193873 | G       | A         | DP=311 | SYNONYMOUS_CODING                | SILENT   | ttG/ttA    | L3736   |
| PyYM_07_v1 | 193969 | 193969 | 193969 | T       | C         | DP=341 | SYNONYMOUS_CODING                | SILENT   | taT/taC    | Y3768   |
| PyYM_07_v1 | 194029 | 194029 | 194029 | T       | C         | DP=403 | SYNONYMOUS_CODING                | SILENT   | aaT/aaC    | N3788   |
| PyYM_07_v1 | 194107 | 194107 | 194107 | C       | A         | DP=344 | SYNONYMOUS_CODING                | SILENT   | ctC/ctA    | L3814   |
| PyYM_07_v1 | 194172 | 194172 | 194172 | C       | T         | DP=270 | NON_SYNONYMOUS_CODING            | MISSENSE | aCt/aTt    | T3836I  |
| PyYM_07_v1 | 194458 | 194458 | 194458 | C       | T         | DP=294 | SYNONYMOUS_CODING                | SILENT   | tgC/tgT    | C3931   |
| PyYM_07_v1 | 195027 | 195027 | 195027 | C       | T         | DP=339 | NON_SYNONYMOUS_CODING            | MISSENSE | aCa/aTa    | T4121I  |
| PyYM_07_v1 | 195178 | 195178 | 195178 | T       | C         | DP=324 | SYNONYMOUS_CODING                | SILENT   | gtT/gtC    | V4171   |
| PyYM_07_v1 | 195201 | 195201 | 195201 | A       | G         | DP=324 | NON_SYNONYMOUS_CODING            | MISSENSE | aAt/aGt    | N4179S  |
| PyYM_07_v1 | 195415 | 195415 | 195415 | C       | A         | DP=280 | SYNONYMOUS_CODING                | SILENT   | ccC/ccA    | P4250   |
| PyYM_07_v1 | 195424 | 195424 | 195424 | T       | C         | DP=259 | SYNONYMOUS_CODING                | SILENT   | aaT/aaC    | N4253   |
| PyYM_07_v1 | 195745 | 195745 | 195745 | T       | C         | DP=308 | SYNONYMOUS_CODING                | SILENT   | gaT/gaC    | D4360   |
| PyYM_07_v1 | 195859 | 195859 | 195859 | C       | T         | DP=504 | SYNONYMOUS_CODING                | SILENT   | gaC/gaT    | D4398   |
| PyYM_07_v1 | 196000 | 196000 | 196000 | C       | A         | DP=386 | NON_SYNONYMOUS_CODING            | MISSENSE | gaC/gaA    | D4445E  |
| PyYM_07_v1 | 196129 | 196129 | 196129 | G       | A         | DP=244 | SYNONYMOUS_CODING                | SILENT   | gaG/gaA    | E4488   |
| PyYM_07_v1 | 196153 | 196153 | 196153 | CGATGAT | CGATGATGA | DP=233 | CODON_CHANGE_PLUS_CODON_DELETION |          | gatgaa/gaa | DE4502E |
| PyYM_07_v1 | 196399 | 196399 | 196399 | G       | T         | DP=436 | SYNONYMOUS_CODING                | SILENT   | tcG/tcT    | S4578   |
| PyYM_07_v1 | 196431 | 196431 | 196431 | G       | A         | DP=369 | NON_SYNONYMOUS_CODING            | MISSENSE | aGt/aAt    | S4589N  |
| PyYM_07_v1 | 196744 | 196744 | 196744 | C       | T         | DP=407 | SYNONYMOUS_CODING                | SILENT   | aaC/aaT    | N4693   |
| PyYM_07_v1 | 196858 | 196858 | 196858 | G       | A         | DP=411 | SYNONYMOUS_CODING                | SILENT   | aaG/aaA    | K4731   |



|            |        |        |        |   |   |        |                       |          |         |        |
|------------|--------|--------|--------|---|---|--------|-----------------------|----------|---------|--------|
| PyYM_07_v1 | 196910 | 196910 | 196910 | G | A | DP=349 | NON_SYNONYMOUS_CODING | MISSENSE | Gac/Aac | D4749N |
| PyYM_07_v1 | 196918 | 196918 | 196918 | T | G | DP=329 | NON_SYNONYMOUS_CODING | MISSENSE | aaT/aaG | N4751K |
| PyYM_07_v1 | 196995 | 196995 | 196995 | A | G | DP=343 | NON_SYNONYMOUS_CODING | MISSENSE | cAt/cGt | H4777R |
| PyYM_07_v1 | 197170 | 197170 | 197170 | T | C | DP=368 | SYNONYMOUS_CODING     | SILENT   | tcT/tcC | S4835  |
| PyYM_07_v1 | 197297 | 197297 | 197297 | A | C | DP=264 | NON_SYNONYMOUS_CODING | MISSENSE | Ata/Cta | I4878L |
| PyYM_07_v1 | 197336 | 197336 | 197336 | A | G | DP=286 | NON_SYNONYMOUS_CODING | MISSENSE | Aca/Gca | T4891A |
| PyYM_07_v1 | 197391 | 197391 | 197391 | T | C | DP=314 | NON_SYNONYMOUS_CODING | MISSENSE | aTa/aCa | I4909T |
| PyYM_07_v1 | 197407 | 197407 | 197407 | C | T | DP=313 | SYNONYMOUS_CODING     | SILENT   | gaC/gaT | D4914  |
| PyYM_07_v1 | 197500 | 197500 | 197500 | C | T | DP=357 | SYNONYMOUS_CODING     | SILENT   | gaC/gaT | D4945  |
| PyYM_07_v1 | 197624 | 197624 | 197624 | G | A | DP=354 | NON_SYNONYMOUS_CODING | MISSENSE | Gtt/Att | V4987I |
| PyYM_07_v1 | 197704 | 197704 | 197704 | A | G | DP=275 | SYNONYMOUS_CODING     | SILENT   | ccA/ccG | P5013  |
| PyYM_07_v1 | 198022 | 198022 | 198022 | C | T | DP=355 | SYNONYMOUS_CODING     | SILENT   | aaC/aaT | N5119  |
| PyYM_07_v1 | 198167 | 198167 | 198167 | A | T | DP=391 | NON_SYNONYMOUS_CODING | MISSENSE | Ata/Tta | I5168L |
| PyYM_07_v1 | 198200 | 198200 | 198200 | G | A | DP=394 | NON_SYNONYMOUS_CODING | MISSENSE | Gtt/Att | V5179I |
| PyYM_07_v1 | 198245 | 198245 | 198245 | A | G | DP=376 | NON_SYNONYMOUS_CODING | MISSENSE | Atg/Gtg | M5194V |
| PyYM_07_v1 | 198373 | 198373 | 198373 | T | C | DP=378 | SYNONYMOUS_CODING     | SILENT   | gtT/gtC | V5236  |
| PyYM_07_v1 | 198511 | 198511 | 198511 | T | C | DP=355 | SYNONYMOUS_CODING     | SILENT   | gaT/gaC | D5282  |
| PyYM_07_v1 | 198811 | 198811 | 198811 | T | C | DP=352 | SYNONYMOUS_CODING     | SILENT   | gcT/gcC | A5382  |
| PyYM_07_v1 | 198849 | 198849 | 198849 | T | C | DP=285 | NON_SYNONYMOUS_CODING | MISSENSE | cTt/cCt | L5395P |
| PyYM_07_v1 | 198911 | 198911 | 198911 | A | G | DP=323 | NON_SYNONYMOUS_CODING | MISSENSE | Atc/Gtc | I5416V |
| PyYM_07_v1 | 198953 | 198953 | 198953 | A | T | DP=346 | NON_SYNONYMOUS_CODING | MISSENSE | Ata/Tta | I5430L |
| PyYM_07_v1 | 198958 | 198958 | 198958 | T | C | DP=353 | SYNONYMOUS_CODING     | SILENT   | aaT/aaC | N5431  |
| PyYM_07_v1 | 198960 | 198960 | 198960 | G | A | DP=354 | NON_SYNONYMOUS_CODING | MISSENSE | gGc/gAc | G5432D |
| PyYM_07_v1 | 199102 | 199102 | 199102 | C | T | DP=318 | SYNONYMOUS_CODING     | SILENT   | aaC/aaT | N5479  |
| PyYM_07_v1 | 199111 | 199111 | 199111 | C | T | DP=323 | SYNONYMOUS_CODING     | SILENT   | gaC/gaT | D5482  |
| PyYM_07_v1 | 199537 | 199537 | 199537 | C | A | DP=288 | SYNONYMOUS_CODING     | SILENT   | acC/acA | T5624  |
| PyYM_07_v1 | 199601 | 199601 | 199601 | A | C | DP=324 | NON_SYNONYMOUS_CODING | MISSENSE | Aat/Cat | N5646H |
| PyYM_07_v1 | 199708 | 199708 | 199708 | C | T | DP=385 | SYNONYMOUS_CODING     | SILENT   | ggC/ggT | G5681  |
| PyYM_07_v1 | 199713 | 199713 | 199713 | G | A | DP=398 | NON_SYNONYMOUS_CODING | MISSENSE | aGa/aAa | R5683K |
| PyYM_07_v1 | 199907 | 199907 | 199907 | C | T | DP=361 | NON_SYNONYMOUS_CODING | MISSENSE | Cca/Tea | P5748S |
| PyYM_07_v1 | 199976 | 199976 | 199976 | G | A | DP=372 | NON_SYNONYMOUS_CODING | MISSENSE | Gca/Aca | A5771T |
| PyYM_07_v1 | 200010 | 200010 | 200010 | A | G | DP=374 | NON_SYNONYMOUS_CODING | MISSENSE | aAt/aGt | N5782S |
| PyYM_07_v1 | 200014 | 200014 | 200014 | C | T | DP=374 | SYNONYMOUS_CODING     | SILENT   | ggC/ggT | G5783  |
| PyYM_07_v1 | 200016 | 200016 | 200016 | C | A | DP=375 | NON_SYNONYMOUS_CODING | MISSENSE | cCa/cAa | P5784Q |
| PyYM_07_v1 | 200034 | 200034 | 200034 | A | T | DP=349 | NON_SYNONYMOUS_CODING | MISSENSE | gAa/gTa | E5790V |
| PyYM_07_v1 | 200041 | 200041 | 200041 | A | C | DP=152 | NON_SYNONYMOUS_CODING | MISSENSE | agA/agC | R5792S |
| PyYM_07_v1 | 200158 | 200158 | 200158 | T | C | DP=384 | SYNONYMOUS_CODING     | SILENT   | gaT/gaC | D5831  |
| PyYM_07_v1 | 200269 | 200269 | 200269 | G | A | DP=339 | SYNONYMOUS_CODING     | SILENT   | ggG/ggA | G5868  |
| PyYM_07_v1 | 200338 | 200338 | 200338 | C | T | DP=336 | SYNONYMOUS_CODING     | SILENT   | atC/atT | I5891  |
| PyYM_07_v1 | 200359 | 200359 | 200359 | A | G | DP=370 | SYNONYMOUS_CODING     | SILENT   | tcA/tcG | S5898  |
| PyYM_07_v1 | 200380 | 200380 | 200380 | A | G | DP=377 | SYNONYMOUS_CODING     | SILENT   | tcA/tcG | S5905  |
| PyYM_07_v1 | 200425 | 200425 | 200425 | A | G | DP=391 | SYNONYMOUS_CODING     | SILENT   | ggA/ggG | G5920  |
| PyYM_07_v1 | 200832 | 200832 | 200832 | G | A | DP=327 | NON_SYNONYMOUS_CODING | MISSENSE | aGc/aAc | S6056N |
| PyYM_07_v1 | 200947 | 200947 | 200947 | T | C | DP=332 | SYNONYMOUS_CODING     | SILENT   | ccT/ccC | P6094  |
| PyYM_07_v1 | 200983 | 200983 | 200983 | C | T | DP=317 | SYNONYMOUS_CODING     | SILENT   | aaC/aaT | N6106  |
| PyYM_07_v1 | 201115 | 201115 | 201115 | C | T | DP=235 | SYNONYMOUS_CODING     | SILENT   | gtC/gtT | V6150  |
| PyYM_07_v1 | 201229 | 201229 | 201229 | A | T | DP=315 | SYNONYMOUS_CODING     | SILENT   | atA/atT | I6188  |
| PyYM_07_v1 | 201562 | 201562 | 201562 | G | A | DP=303 | SYNONYMOUS_CODING     | SILENT   | ttG/ttA | L6299  |
| PyYM_07_v1 | 201657 | 201657 | 201657 | T | A | DP=236 | NON_SYNONYMOUS_CODING | MISSENSE | tTt/tAt | F6331Y |
| PyYM_07_v1 | 201826 | 201826 | 201826 | A | G | DP=313 | SYNONYMOUS_CODING     | SILENT   | ttA/ttG | L6387  |
| PyYM_07_v1 | 201880 | 201880 | 201880 | T | C | DP=327 | SYNONYMOUS_CODING     | SILENT   | acT/acC | T6405  |

|            |        |        |        |        |   |   |        |                       |          |         |        |
|------------|--------|--------|--------|--------|---|---|--------|-----------------------|----------|---------|--------|
| PyYM_07_v1 | 201928 | 201928 | 201928 | 201928 | T | C | DP=316 | SYNONYMOUS_CODING     | SILENT   | gaT/gaC | D6421  |
| PyYM_07_v1 | 202192 | 202192 | 202192 | 202192 | G | C | DP=288 | SYNONYMOUS_CODING     | SILENT   | ggG/ggC | G6509  |
| PyYM_07_v1 | 202327 | 202327 | 202327 | 202327 | C | T | DP=314 | SYNONYMOUS_CODING     | SILENT   | taC/taT | Y6554  |
| PyYM_07_v1 | 202621 | 202621 | 202621 | 202621 | C | A | DP=313 | SYNONYMOUS_CODING     | SILENT   | atC/atA | I6652  |
| PyYM_07_v1 | 202634 | 202634 | 202634 | 202634 | T | C | DP=304 | NON_SYNONYMOUS_CODING | MISSENSE | Tat/Cat | Y6657H |
| PyYM_07_v1 | 202702 | 202702 | 202702 | 202702 | T | C | DP=363 | SYNONYMOUS_CODING     | SILENT   | aaT/aaC | N6679  |
| PyYM_07_v1 | 202954 | 202954 | 202954 | 202954 | T | C | DP=292 | SYNONYMOUS_CODING     | SILENT   | gaT/gaC | D6763  |
| PyYM_07_v1 | 202956 | 202956 | 202956 | 202956 | G | A | DP=290 | NON_SYNONYMOUS_CODING | MISSENSE | aGc/aAc | S6764N |
| PyYM_07_v1 | 203042 | 203042 | 203042 | 203042 | A | C | DP=357 | NON_SYNONYMOUS_CODING | MISSENSE | Aat/Cat | N6793H |
| PyYM_07_v1 | 203048 | 203048 | 203048 | 203048 | C | A | DP=359 | NON_SYNONYMOUS_CODING | MISSENSE | Cat/Aat | H6795N |
| PyYM_07_v1 | 203054 | 203054 | 203054 | 203054 | A | C | DP=361 | NON_SYNONYMOUS_CODING | MISSENSE | Aat/Cat | N6797H |
| PyYM_07_v1 | 203079 | 203079 | 203079 | 203079 | A | G | DP=380 | NON_SYNONYMOUS_CODING | MISSENSE | aAt/aGt | N6805S |
| PyYM_07_v1 | 203101 | 203101 | 203101 | 203101 | A | T | DP=397 | SYNONYMOUS_CODING     | SILENT   | atA/atT | I6812  |
| PyYM_07_v1 | 203240 | 203240 | 203240 | 203240 | T | G | DP=396 | NON_SYNONYMOUS_CODING | MISSENSE | Ttc/Gtc | F6859V |
| PyYM_07_v1 | 203246 | 203246 | 203246 | 203246 | T | G | DP=400 | NON_SYNONYMOUS_CODING | MISSENSE | Tct/Get | S6861A |
| PyYM_07_v1 | 203285 | 203285 | 203285 | 203285 | A | C | DP=415 | NON_SYNONYMOUS_CODING | MISSENSE | Aat/Cat | N6874H |
| PyYM_07_v1 | 203365 | 203365 | 203365 | 203365 | C | T | DP=385 | SYNONYMOUS_CODING     | SILENT   | agC/agT | S6900  |
| PyYM_07_v1 | 203368 | 203368 | 203368 | 203368 | A | G | DP=377 | SYNONYMOUS_CODING     | SILENT   | ttA/ttG | L6901  |
| PyYM_07_v1 | 203380 | 203380 | 203380 | 203380 | T | C | DP=375 | SYNONYMOUS_CODING     | SILENT   | gaT/gaC | D6905  |
| PyYM_07_v1 | 203468 | 203468 | 203468 | 203468 | G | C | DP=285 | NON_SYNONYMOUS_CODING | MISSENSE | Gaa/Caa | E6935Q |
| PyYM_07_v1 | 203469 | 203469 | 203469 | 203469 | A | C | DP=283 | NON_SYNONYMOUS_CODING | MISSENSE | gAa/gCa | E6935A |
| PyYM_07_v1 | 203472 | 203472 | 203472 | 203472 | C | A | DP=283 | NON_SYNONYMOUS_CODING | MISSENSE | gCg/gAg | A6936E |
| PyYM_07_v1 | 203512 | 203512 | 203512 | 203512 | T | C | DP=237 | SYNONYMOUS_CODING     | SILENT   | atT/atC | I6949  |
| PyYM_07_v1 | 203788 | 203788 | 203788 | 203788 | C | T | DP=314 | SYNONYMOUS_CODING     | SILENT   | aaC/aaT | N7041  |
| PyYM_07_v1 | 203884 | 203884 | 203884 | 203884 | G | A | DP=321 | SYNONYMOUS_CODING     | SILENT   | caG/caA | Q7073  |
| PyYM_07_v1 | 204316 | 204316 | 204316 | 204316 | T | C | DP=296 | SYNONYMOUS_CODING     | SILENT   | aaT/aaC | N7217  |
| PyYM_07_v1 | 204328 | 204328 | 204328 | 204328 | C | T | DP=309 | SYNONYMOUS_CODING     | SILENT   | ccC/ccT | P7221  |
| PyYM_07_v1 | 204775 | 204775 | 204775 | 204775 | T | C | DP=357 | SYNONYMOUS_CODING     | SILENT   | gaT/gaC | D7370  |
| PyYM_07_v1 | 205096 | 205096 | 205096 | 205096 | T | C | DP=303 | SYNONYMOUS_CODING     | SILENT   | tcT/tcC | S7477  |

PosiBon, nucleoBde posiBons on chromosome 7; Depth, sequence read coverage; the numbers indicate reads covering the site; Coding\_synonymous\_nonsynonymous, the nature of nucleoBde subsBtuBons; MutaBon, mutaBon types. The *Plasmodium yoelii yoelii* YM sequence was from public database (<https://www.sanger.ac.uk/resources/downloads/protozoa/plasmodium-yoelii.html>), and the *Plasmodium y. nigeriensis* was from our own sequencing as described (Niar et al., Mol Biochem Parasitol 194, 9-15). The changes leading to amino acid changes are color-highlighted.

**Supplementary Table 5.** Sequences of primers used for PCR and for building plasmid constructs.

| Primers for amplifying cDNA tiling the Plasmidium yoelii HECT E3 uninitque ligase gene (5'-3') |                                  |      |                                                         |
|------------------------------------------------------------------------------------------------|----------------------------------|------|---------------------------------------------------------|
| Name                                                                                           | Forward primer sequences (5'-3') | Name | Reverse primer sequences (5'-3')<br>Product length (bp) |
| p1                                                                                             | ATGAAAATCCAACTTCCCAAAG           | p2   | CAATTAAATGTATCTGTTGGGA 2737                             |
| p3                                                                                             | TCCCCAACAGATACATTAATTG           | p4   | TTTCTATCAATAAAAAGTCCAG 1060                             |
| p5                                                                                             | CTGGACCTTTTATTGATAGAAA           | p6   | GAAC TAGAGTTGTAAGAATCAGA 1815                           |
| p7                                                                                             | CTGTATTCTTACAACCTAGTTC           | p8   | ATTCGTCGGTTCTATTATGA 1744                               |
| p9                                                                                             | TCATAATAGAAACCGCGAAAT            | p10  | CAATTGTGCATACCTCTGTAT 1700                              |
| p11                                                                                            | ATACAGAAGTATGCACAAATG            | p12  | ATATGTGTTTATGGAATCTGGA 2653                             |
| p13                                                                                            | TCCAGATTCCATAAACACATAT           | p14  | TTCAATATCTTCTTCTCGT 1410                                |
| p15                                                                                            | ACGAAGAAGAAGATCTGAAGA            | p16  | TCGTCAATTCCTCAGATATA 1532                               |
| p17                                                                                            | TATATCTGAGGAAATGACGA             | p18  | AGCTGATTCCTTCTCATTAGT 1489                              |
| p19                                                                                            | ACTAAATGAAGAAGATCAGC             | p20  | CGTTAATCGAGTATCTTCTGT 2926                              |
| p21                                                                                            | ACAGAAGATCTCGATTAACCG            | p22  | GAAC TAGACTCTGCTGAATTAT 1171                            |
| p23                                                                                            | ATAATTCAGCAGATCTAGTTC            | p24  | TTATATAAATCCGAAACCTCT 2263                              |

  

| Primers for linear <i>Pyhebl</i> knockout construct (5'-3') |                                                  |      |                                                        |
|-------------------------------------------------------------|--------------------------------------------------|------|--------------------------------------------------------|
| Name                                                        | Forward primer sequences (5'-3')                 | Name | Reverse primer sequences (5'-3')                       |
| PIF1                                                        | GCTAAGGCTATTTTTATATTTC                           | PIR1 | GCTGGCTGCAGGAA TTATCAAGCTTTACATTATCACGTCCTTAAA         |
| PIF2                                                        | TTTAAGGACGTGATAATGTAAAGCTTGATAATCTCTGCAGCCACG    | PIR2 | CAAAATGATGTTTTTTCCTTCAATT TCGGTAC ATATACCACATACATTAAGT |
| PIF3                                                        | ACTTAATGTATGGGTATATGTACCGAAATGAAGGAAAAACATCATTTG | PIR3 | ATGATGGTGATGTTGGTGAA                                   |
| PI1                                                         | CTCTTCAATGATTCATAAATAGTTGGAC                     | PI3  | ATGATGGTGATGTTGGTGAA                                   |
| PI2                                                         | TATGTGTCTCTTCAATGATTC                            | PI4  | TGGTGATGTTGGTGAGAAA                                    |

  

| Primers insertion at 5' UTR of the <i>Pyhebl</i> gene (5'-3') |                                  |      |                                  |
|---------------------------------------------------------------|----------------------------------|------|----------------------------------|
| Name                                                          | Forward primer sequences (5'-3') | Name | Reverse primer sequences (5'-3') |
| PIF1                                                          | CGGGTACCTGCAACATATTTCCAAAGCAT    | PIR1 | AGGCGCGTACATAAGCTATGAAAGTGT      |
| PI1                                                           | TGTTGAATTAGATGGTGATGT            | PI2  | AGAGGCATTTATTTTGTGGT             |
| PI3                                                           | CGAAGATGAGAATGAAATAGCG           | PI4  | CCTAATATCGGCATCAGA               |
| PI5                                                           | GATTCATAAATAGTTGGACTTGA          | PI6  | CATTGCCATTTAATCTTCTTCA           |

  

| Primers for 5' UTR insertion at 18S rRNA gene (5'-3') |                                  |       |                                  |
|-------------------------------------------------------|----------------------------------|-------|----------------------------------|
| Name                                                  | Forward primer sequences (5'-3') | Name  | Reverse primer sequences (5'-3') |
| 18SF1                                                 | TTGAAATAGCAGCATAGCA              | 18SR1 | CCTAATATCGGCATCAGA               |
| 18SF2                                                 | CTGAAGTCAAGTTTGAAGT              | 18SR2 | AAGACATCCATCGTTAAGATT            |

  

Primers for vector constructions using CRISPR/Cas9 system and for checking transfectants

| Primer name | Primer sequence (5'-3')                            | Targets and descriptions                                 |
|-------------|----------------------------------------------------|----------------------------------------------------------|
| HEUL-1K55   | atcgAAGCTTCAACAAAATCTCTATACATTACTATTC              | Left arm, 5'UTR                                          |
| HEUL-1K53   | gcatCCATGGTGTCTTACTCATAAATTTAGAAAATAATAAAAACA      | Left arm, 5'UTR                                          |
| HEUL-1K35   | gcatCTCGAGATAAATTCGAATCTCTATGTATATATATTACC         | Right arm, 3'UTR                                         |
| HEUL-1K33   | gcatGAATTCATAAATGAAGAACAATAATTCTAC                 | Right arm, 3'UTR                                         |
| K1-sgRNA-F  | TATTGGATGTAATAAATTAGGAAT                           | KO targeting sgRNA                                       |
| K1-sgRNA-R  | AAACATTCCTAATTTTTTACATCC                           | KO targeting sgRNA                                       |
| K1-F1       | AAACAACCTTTATCATTAAGAAAATTTATAG                    | 5'UTR                                                    |
| K1-R1       | GTGAGTTTCTCATACGAAATAGTG                           | 3'UTR                                                    |
| K1-F2       | GATGTACTTCAAAATGCTTATGAT                           | Coding region                                            |
| K1-R2       | CATTATATGGTCTTATAGGGT                              | Coding region                                            |
| HEUL-2K55   | atcgAAGCTTGATGTACTTCAAAATGCTTATGAT                 | Left arm, coding region                                  |
| HEUL-2K53   | gcatCCATGGCATTATATGGTCTTATAGGGT                    | Left arm, coding region                                  |
| HEUL-2K35   | gcatCTCGAGTTTTAATGTCTGCATATGCAGA                   | Right arm, coding region                                 |
| HEUL-2K33   | gcatGAATTCATAAATTCAGTGTGTTGTACATGTGA               | Right arm, coding region                                 |
| K2-sgRNA-F  | TATTGGTGATATAGCAGTTTCAAT                           | KO targeting sgRNA                                       |
| K2-sgRNA-R  | AAACATGAAACTGCTATATACCC                            | KO targeting sgRNA                                       |
| K2-F1       | TACATCTATATTTCCAAACCAAGTT                          | Coding region                                            |
| K2-R1       | CATTCTCATTATGTTGCCTTGAT                            | Coding region                                            |
| K2-F2       | GATATTAATTAACAATATCAGAAGA                          | Coding region                                            |
| K2-R2       | CGATTGAACTGCTATATACCA                              | Coding region                                            |
| HEUL-R1F    | gcatCCATGGAAATCGAGATCAGAACTAACCA                   | Homology arm for R1                                      |
| HEUL-R1R    | gcatCTCGAGGTATCTGTTGGGAAATACC                      | Homology arm for R1                                      |
| HEUL-R1LF   | TGGAACCATCTCCGATCTTCAACAATAGCACAACAAAATACTTTAAAGAC | Synonymous mutations introduced in R1 sgRNA binding site |
| HEUL-R1LR   | TTGTTGTGCTATTGTCAAGATCGGAGATGGTCCATTATACATGTATGA   | Synonymous mutations introduced in R1 sgRNA binding site |
| R1-sgRNA-F  | TATTGCTATTGTTAAAATAGGAGA                           | R1 targeting sgRNA                                       |
| R1-sgRNA-R  | AAACTCTCCTATTTAACAATAGC                            | R1 targeting sgRNA                                       |
| HEUL-R2F    | gcatCCATGGCTCCGATTTTACAAGTTACATACCT                | Homology arm for R2                                      |
| HEUL-R2R    | gcatCTCGAGGAATCAAAATCACCAGTAAAGT                   | Homology arm for R2                                      |
| HEUL-R2LF   | AATGTTACACCCGTTCCAGAGAATTAATCAAAACATATGGCAA        | Synonymous mutations introduced in R2 sgRNA binding site |
| HEUL-R2LR   | CATATGTTGATTAATCTCGTAAACGGGTGAACATTTTGAAGT         | Synonymous mutations introduced in R2 sgRNA binding site |
| R2-sgRNA-F  | TATTGTTGATTAATCTTGTAA                              | R2 targeting sgRNA                                       |
| R2-sgRNA-R  | AAACTTTACAAGAATTAATCAAAC                           | R2 targeting sgRNA                                       |
| HM3-F       | ACGCTAATCGTAGCTAGCCTGCT                            | Introduced sense primer for integration detection        |
| HM5-R       | CGATTAGCCTCCGCGGGACCAT                             | Introduced reverse primer for integration detection      |

  

| Primers for amplification of tubulin alpha |                             |
|--------------------------------------------|-----------------------------|
| Primer name                                | Primer sequence (5'-3')     |
| tub_af1                                    | ATGAGAGAAGTAATAAGTATACATG   |
| tub_ar1                                    | TTAATAATCTGCTTCATATCTTCCGTC |

Note: Nucleotides in red are restriction sites, and those in green are substitutions introduced into gRNA to prevent cleavage by the enzyme.

**Supplementary Table 6.** Day 4 parasitemia of different R1 replacement clones after injecting BALB/c mice with  $1 \times 10^6$  parasites (*i.v.*)

| Parasite                    | Mouse number | Day 4 parasitemia | Averaged parasitemia | Standard deviation | Standard error | Averaged parasitemia (combined) | Standard deviation (combined) | Standard error (combined) |
|-----------------------------|--------------|-------------------|----------------------|--------------------|----------------|---------------------------------|-------------------------------|---------------------------|
| 17XL                        | 1            | 89.35%            | 83.15%               | 8.60%              | 4.30%          | 82.20%                          | 6.33%                         | 2.24%                     |
|                             | 2            | 89.28%            |                      |                    |                |                                 |                               |                           |
|                             | 3            | 82.88%            |                      |                    |                |                                 |                               |                           |
|                             | 4            | 71.07%            |                      |                    |                |                                 |                               |                           |
|                             | Repeat 5     | 80.58%            |                      |                    |                |                                 |                               |                           |
|                             | 6            | 79.76%            |                      |                    |                |                                 |                               |                           |
|                             | 7            | 87.14%            |                      |                    |                |                                 |                               |                           |
|                             | 8            | 77.53%            |                      |                    |                |                                 |                               |                           |
| N67                         | 1            | 48.61%            | 44.81%               | 3.69%              | 1.85%          | 44.49%                          | 2.69%                         | 0.95%                     |
|                             | 2            | 44.54%            |                      |                    |                |                                 |                               |                           |
|                             | 3            | 39.87%            |                      |                    |                |                                 |                               |                           |
|                             | 4            | 46.22%            |                      |                    |                |                                 |                               |                           |
|                             | Repeat 5     | 41.88%            |                      |                    |                |                                 |                               |                           |
|                             | 6            | 46.04%            |                      |                    |                |                                 |                               |                           |
|                             | 7            | 44.73%            |                      |                    |                |                                 |                               |                           |
|                             | 8            | 44.04%            |                      |                    |                |                                 |                               |                           |
| 17XL-R1 <sup>17XL-112</sup> | 1            | 76.59%            | 89.27%               | 8.51%              | 4.25%          | 89.53%                          | 8.96%                         | 3.17%                     |
|                             | 2            | 92.17%            |                      |                    |                |                                 |                               |                           |
|                             | 3            | 93.88%            |                      |                    |                |                                 |                               |                           |
|                             | 4            | 94.44%            |                      |                    |                |                                 |                               |                           |
|                             | Repeat 5     | 93.66%            |                      |                    |                |                                 |                               |                           |
|                             | 6            | 94.90%            |                      |                    |                |                                 |                               |                           |
|                             | 7            | 73.83%            |                      |                    |                |                                 |                               |                           |
|                             | 8            | 96.78%            |                      |                    |                |                                 |                               |                           |
| 17XL-R1 <sup>17XL-132</sup> | 1            | 6.26%             | 10.01%               | 2.80%              | 1.40%          |                                 |                               |                           |
|                             | 2            | 10.21%            |                      |                    |                |                                 |                               |                           |
|                             | 3            | 10.50%            |                      |                    |                |                                 |                               |                           |
|                             | 4            | 13.05%            |                      |                    |                |                                 |                               |                           |
| N67-R1 <sup>17XL-234</sup>  | 1            | 56.60%            | 56.02%               | 1.49%              | 0.74%          | 52.53%                          | 5.46%                         | 1.93%                     |
|                             | 2            | 54.27%            |                      |                    |                |                                 |                               |                           |
|                             | 3            | 55.49%            |                      |                    |                |                                 |                               |                           |
|                             | 4            | 57.74%            |                      |                    |                |                                 |                               |                           |
|                             | Repeat 5     | 42.40%            |                      |                    |                |                                 |                               |                           |
|                             | 6            | 47.83%            |                      |                    |                |                                 |                               |                           |
|                             | 7            | 56.68%            |                      |                    |                |                                 |                               |                           |
|                             | 8            | 49.21%            |                      |                    |                |                                 |                               |                           |
| N67-R1 <sup>17XL-213</sup>  | 1            | 34.50%            | 38.60%               | 6.03%              | 3.02%          |                                 |                               |                           |
|                             | 2            | 37.02%            |                      |                    |                |                                 |                               |                           |
|                             | 3            | 35.38%            |                      |                    |                |                                 |                               |                           |
|                             | 4            | 47.51%            |                      |                    |                |                                 |                               |                           |
| 17XL-R1 <sup>N67-3323</sup> | 1            | 89.49%            | 87.32%               | 4.01%              | 2.01%          | 87.11%                          | 3.49%                         | 1.24%                     |
|                             | 2            | 83.74%            |                      |                    |                |                                 |                               |                           |
|                             | 3            | 84.15%            |                      |                    |                |                                 |                               |                           |
|                             | 4            | 91.88%            |                      |                    |                |                                 |                               |                           |
|                             | Repeat 5     | 91.88%            |                      |                    |                |                                 |                               |                           |
|                             | 6            | 86.59%            |                      |                    |                |                                 |                               |                           |
|                             | 7            | 83.85%            |                      |                    |                |                                 |                               |                           |
|                             | 8            | 85.32%            |                      |                    |                |                                 |                               |                           |
| 17XL-R1 <sup>N67-3334</sup> | 1            | 63.88%            | 63.35%               | 7.99%              | 3.57%          | 68.61%                          | 9.78%                         | 3.09%                     |
|                             | 2            | 76.72%            |                      |                    |                |                                 |                               |                           |
|                             | 3            | 57.07%            |                      |                    |                |                                 |                               |                           |
|                             | 4            | 57.53%            |                      |                    |                |                                 |                               |                           |
|                             | Repeat 5     | 61.56%            |                      |                    |                |                                 |                               |                           |
|                             | 6            | 68.80%            |                      |                    |                |                                 |                               |                           |
|                             | 7            | 75.18%            |                      |                    |                |                                 |                               |                           |
|                             | 8            | 83.85%            |                      |                    |                |                                 |                               |                           |
|                             | 9            | 61.17%            |                      |                    |                |                                 |                               |                           |
|                             | 10           | 80.31%            |                      |                    |                |                                 |                               |                           |
| N67-R1 <sup>N67-421</sup>   | 1            | 44.68%            | 46.28%               | 3.38%              | 1.69%          | 46.02%                          | 3.59%                         | 1.27%                     |
|                             | 2            | 48.39%            |                      |                    |                |                                 |                               |                           |
|                             | 3            | 42.35%            |                      |                    |                |                                 |                               |                           |
|                             | 4            | 49.71%            |                      |                    |                |                                 |                               |                           |
|                             | Repeat 5     | 41.99%            |                      |                    |                |                                 |                               |                           |
|                             | 6            | 51.94%            |                      |                    |                |                                 |                               |                           |
|                             | 7            | 44.23%            |                      |                    |                |                                 |                               |                           |
|                             | 8            | 44.90%            |                      |                    |                |                                 |                               |                           |
| N67-R1 <sup>N67-414</sup>   | 1            | 17.57%            | 14.78%               | 2.41%              | 1.20%          |                                 |                               |                           |
|                             | 2            | 14.36%            |                      |                    |                |                                 |                               |                           |
|                             | 3            | 11.77%            |                      |                    |                |                                 |                               |                           |
|                             | 4            | 15.41%            |                      |                    |                |                                 |                               |                           |

Note: Those highlighted in orange color are groups with unexpected growth phenotypes, deviating greatly from the parents. Repeats are infections of mice with the same parasite clones at different times, usually several weeks or months apart.

**Supplementary Table 7.** Parasitemia of mice infected with R2 allelic exchanged parasites.

| Mouse group | Mouse number | Parasite clone            | Day 4 parasitemia |
|-------------|--------------|---------------------------|-------------------|
| 1           | 1            | 17XL                      | 89.35%            |
|             | 2            |                           | 89.28%            |
|             | 3            |                           | 82.88%            |
|             | 4            |                           | 71.07%            |
|             |              | Average                   | 83.15%            |
|             |              | SD                        | 8.60%             |
|             |              | SE                        | 4.30%             |
| 2           | 1            | N67                       | 48.61%            |
|             | 2            |                           | 44.54%            |
|             | 3            |                           | 39.87%            |
|             | 4            |                           | 46.22%            |
|             |              | Average                   | 44.81%            |
|             |              | SD                        | 3.69%             |
|             |              | SE                        | 1.85%             |
| 3           | 1            | N67-R2 <sup>17XL-11</sup> | 45.04%            |
|             | 2            |                           | 29.45%            |
|             | 3            |                           | 51.41%            |
|             | 4            |                           | 46.63%            |
|             |              | Average                   | 43.13%            |
|             |              | SD                        | 9.52%             |
|             |              | SE                        | 4.76%             |
| 4           | 1            | N67-R2 <sup>17XL-12</sup> | 52.78%            |
|             | 2            |                           | 49.76%            |
|             | 3            |                           | 43.78%            |
|             | 4            |                           | 53.13%            |
|             |              | Average                   | 49.86%            |
|             |              | SD                        | 4.33%             |
|             |              | SE                        | 2.16%             |
| 5           | 1            | N67-R2 <sup>17XL-23</sup> | 24.70%            |
|             | 2            |                           | 43.90%            |
|             | 3            |                           | 53.64%            |
|             | 4            |                           | 54.19%            |
|             |              | Average                   | 44.11%            |
|             |              | SD                        | 13.78%            |
|             |              | SE                        | 6.89%             |
| 6           | 1            | N67-R2 <sup>17XL-32</sup> | 61.01%            |
|             | 2            |                           | 56.76%            |
|             | 3            |                           | 58.69%            |
|             | 4            |                           | 48.72%            |
|             |              | Average                   | 56.30%            |
|             |              | SD                        | 5.34%             |
|             |              | SE                        | 2.67%             |
| 7           | 1            | N67-R2 <sup>17XL-33</sup> | 56.22%            |
|             | 2            |                           | 58.03%            |
|             | 3            |                           | 51.38%            |
|             | 4            |                           | 54.00%            |
|             |              | Average                   | 54.91%            |
|             |              | SD                        | 2.87%             |
|             |              | SE                        | 1.44%             |
| 8           | 1            | N67-R2 <sup>17XL-43</sup> | 54.96%            |
|             | 2            |                           | 54.57%            |
|             | 3            |                           | 34.83%            |
|             | 4            |                           | 48.69%            |
|             |              | Average                   | 48.26%            |

|    |   |                           |        |
|----|---|---------------------------|--------|
|    |   | SD                        | 9.40%  |
|    |   | SE                        | 4.70%  |
| 9  | 1 | N67-R2 <sup>17XL-52</sup> | 55.60% |
|    | 2 |                           | 56.59% |
|    | 3 |                           | 53.59% |
|    | 4 |                           | 36.43% |
|    |   | Average                   | 50.55% |
|    |   | SD                        | 9.50%  |
|    |   | SE                        | 4.75%  |
| 10 | 1 | N67-R2 <sup>17XL-54</sup> | 42.16% |
|    | 2 |                           | 49.95% |
|    | 3 |                           | 51.08% |
|    | 4 |                           | 47.69% |
|    |   | Average                   | 47.72% |
|    |   | SD                        | 3.97%  |
|    |   | SE                        | 1.98%  |

### Second set of experimnts

|    |   |                           |        |
|----|---|---------------------------|--------|
| 11 | 1 | N67-R2 <sup>17XL-33</sup> | 42.37% |
|    | 2 |                           | 51.23% |
|    | 3 |                           | 57.10% |
|    | 4 |                           | 53.17% |
|    |   | Average                   | 50.96% |
|    |   | SD                        | 6.23%  |
|    |   | SE                        | 3.12%  |
| 12 | 1 | N67-R2 <sup>17XL-52</sup> | 51.67% |
|    | 2 |                           | 55.75% |
|    | 3 |                           | 53.65% |
|    | 4 |                           | 58.48% |
|    |   | Average                   | 54.89% |
|    |   | SD                        | 2.92%  |
|    |   | SE                        | 1.46%  |
| 13 | 1 | N67-R2 <sup>N67-22</sup>  | 47.57% |
|    | 2 |                           | 44.83% |
|    | 3 |                           | 48.78% |
|    | 4 |                           | 41.67% |
|    |   |                           | 33.60% |
|    |   | Average                   | 43.29% |
|    |   | SD                        | 6.07%  |
|    |   | SE                        | 3.04%  |
| 14 | 1 | N67-R2 <sup>N67-53</sup>  | 40.79% |
|    | 2 |                           | 53.84% |
|    | 3 |                           | 43.02% |
|    | 4 |                           | 43.96% |
|    |   | Average                   | 45.40% |
|    |   | SD                        | 5.78%  |
|    |   | SE                        | 2.89%  |

Note: Number in red are averaged parasitemia and standard error (SE).  $1 \times 10^6$  infected red blood cells were injected into BALB/c mice (*i.v.*). Repeat infections were performed approximately four months later. N67-R2<sup>N67</sup> parasites were not available for the first experiments. The numbers highlighted in yellow are "outliers" likely due to technical variation during injection of mice, which causes the relatively large SEs.



## References

- 1 Sen, S. & Churchill, G. A. A statistical framework for quantitative trait mapping. *Genetics* **159**, 371-387 (2001).
- 2 Li, J. *et al.* Linkage maps from multiple genetic crosses and loci linked to growth-related virulent phenotype in *Plasmodium yoelii*. *Proc Natl Acad Sci U S A* **108**, E374-382, doi:10.1073/pnas.1102261108 (2011).
- 3 Ecker, A., Moon, R., Sinden, R. E. & Billker, O. Generation of gene targeting constructs for *Plasmodium berghei* by a PCR-based method amenable to high throughput applications. *Mol Biochem Parasitol* **145**, 265-268 (2006).
- 4 Qi, Y. *et al.* Regulation of *Plasmodium yoelii* oocyst development by strain- and stage-specific small-subunit rRNA. *MBio* **6**, e00117, doi:10.1128/mBio.00117-15 (2015).
- 5 Zhang, C. *et al.* Efficient editing of malaria parasite genome using the CRISPR/Cas9 system. *MBio* **5**, e01414-01414, doi:10.1128/mBio.01414-14 (2014).
